# 1 The Role of Adaptation in Generating Monotonic Rate 2 Codes in Auditory Cortex

3 Jong Hoon Lee<sup>1,2</sup>, Xiaoqin Wang<sup>1</sup>, Daniel Bendor<sup>2</sup>

4 <sup>1</sup> Laboratory of Auditory Neurophysiology, Department of Biomedical Engineering, Johns Hopkins University School of  
5 Medicine, Baltimore, MD, USA

6 <sup>2</sup> Institute of Behavioural Neuroscience, Department of Experimental Psychology, University College London, London, United  
7 Kingdom

8

9

## 10 Abstract

11 In primary auditory cortex, slowly repeated acoustic events are represented temporally by phase-locked  
12 activity of single neurons. Single-unit studies in awake marmosets (*Callithrix jacchus*) have shown that a sub-  
13 population of these neurons also monotonically increase or decrease their average discharge rate during stimulus  
14 presentation for higher repetition rates. Building on a computational single-neuron model that generates phase-  
15 locked responses with stimulus evoked excitation followed by strong inhibition, we find that stimulus-evoked  
16 short-term depression is sufficient to produce synchronized monotonic positive and negative responses to slowly  
17 repeated stimuli. By exploring model robustness and comparing it to other models for adaptation to such stimuli,  
18 we conclude that short-term depression best explains our observations in single-unit recordings in awake  
19 marmosets. Using this model, we emulated how single neurons could encode and decode multiple aspects of an  
20 acoustic stimuli with the monotonic positive and negative encoding of a given stimulus feature. Together, our  
21 results show that a simple biophysical mechanism in single neurons can allow a more complex encoding and  
22 decoding of acoustic stimuli.

23

## 24 Introduction

25 Our ability to discriminate complex sounds such as music [1,2], speech [3,4], and conspecific  
26 vocalizations [5], relies on the auditory system's analysis of an acoustic signal's spectral and temporal structures.  
27 For sequences of brief sounds, the timing of each acoustic event is explicitly encoded by the stimulus-locked  
28 activity of neurons throughout the ascending auditory pathway. In primary auditory cortex (A1), neurons can  
29 temporally lock to individual acoustic events up to around 40-50 Hz [6-10], matching the upper limit of acoustic  
30 flutter (the percept of a sequence of discretely occurring events). While repetition rates within the perceptual range  
31 of acoustic flutter are represented by A1 neurons with phase-locked activity, some of these neurons can also  
32 simultaneously vary their firing rate by monotonically increasing (*Sync+*) or decreasing (*Sync-*) firing rate over  
33 the range of repetition rates that span the range of flutter perception [11]. Temporal coding provides a faithful,  
34 unambiguous representation of the timing of acoustic events. However it must be analysed across time to  
35 determine the repetition rate of the stimulus. Rate coding, on the other hand, provides a more "processed" and  
36 instantaneous readout of repetition rate. Although rate coding is more ubiquitous in brain regions downstream  
37 from auditory cortex, one potential issue is that rate coding is used to represent multiple acoustic features in  
38 auditory cortex. For example, in a typical auditory cortical neuron, an increase in firing rate could represent a  
39 change in frequency, sound level [12], and/or sound location [13] In order for rate coding to be useful to  
40 downstream brain regions, neural circuits must be able to demultiplex concurrently encoded acoustic features.

41 In multiple brain regions, rate coding takes the form of positive and negative monotonic tuning. This form of  
42 opponent coding (positive/negative sloped rate relationship with a stimulus parameter) has been postulated to  
43 provide a number of advantages as an encoding strategy, including robustness to rate changes resulting from  
44 adaptation, allowing for the multiplexing of additional information within an overlapping rate code, and increasing  
45 the accuracy of extracting this information by reducing positively correlated noise between neurons [14]. How  
46 could the brain generate these types of neural representations? To explore this question, we used a leaky integrate-

47 and-fire computational model of a neuron. Previously, we have used a similar modelling approach to generate  
48 stimulus synchronized responses to acoustic pulses in the range of flutter perception, by varying the delay and  
49 relative strength of excitatory and inhibitory inputs [15]. In this E-I (excitation-inhibition) based computational  
50 model, synchronized responses to slowly repeating sounds occur when inhibition is both stronger than and delayed  
51 relative to excitation. Building on this model, Gao et al (2016) [16] added a simplified adaptation mechanism to  
52 stimulus repetition rate, resulting in synchronized responses and non-synchronized monotonic positive and  
53 negative responses, but stimulus repetition rate ranged beyond acoustic flutter. The integration of rate coding in  
54 synchronizing neurons, to generate Sync+ and Sync- responses within the perceptual range of flutter, has not yet  
55 been directly examined using such computational models. Here we investigated the underlying neural mechanisms  
56 responsible for Sync+ and Sync- responses in auditory cortex and demonstrate that the addition of synaptic  
57 depression to the E-I model is sufficient to reproduce these two response modes - specifically stronger synaptic  
58 depression of excitatory inputs relative to inhibitory inputs leads to the Sync- response while weaker synaptic  
59 depression of excitatory inputs relative to inhibitory inputs leads to the Sync+ response. Using this model, we  
60 examined how a downstream neuron can combine Sync+ and Sync- inputs to effectively demultiplex a rate code  
61 such that discharge rate only monotonically varies with a single acoustic parameter.

62

## 63 Results

64 We first examined whether the E-I model described by Bendor (2015) [15] was capable of generating  
65 both Sync+ and Sync- responses to acoustic pulse trains, using the model's three existing independent parameters:  
66 The E/I ratio (the strength of excitatory input divided by the strength of the inhibitory input), the I-E delay (the  
67 temporal lag between the excitatory and inhibitory input), and the overall strength of excitation (Fig.1a). In this  
68 model, the number of spikes produced by each acoustic event was determined by the net excitatory input. If the  
69 number of spikes produced by each acoustic event did not change with repetition rate, neurons linearly increased  
70 their discharge rate with increasing repetition rate (Sync+). However, because the strength of lagging inhibition  
71 can decrease the overall net excitation in a repetition rate dependent manner, Sync- responses could be created at  
72 very high I/E ratios. While we observed that Sync+ responses were generated over a wide range of biologically  
73 plausible excitation and inhibition strengths (Fig1.c-e), Sync- responses could only be generated using  
74 biologically unrealistic I/E ratios, using a 3-fold increase in the strength of inhibition relative to excitation reported  
75 in intracellular recordings [17]. Although discharge rate decreased with increasing repetition rate for these  
76 modelled Sync- neurons, their rate responses were non-significant (firing rate below 2 std above mean  
77 spontaneous rate, see methods for details.), in contrast to the driven responses observed real Sync- neurons  
78 (Bendor and Wang 2007 [11], Fig.1c).

79

80 **Fig 1. Computational model of an auditory cortical neuron.** (A.) Simulated neural responses to an acoustic  
81 click train (top). each click was converted to an excitatory and inhibitory conductance input in our computational  
82 model, using an alpha function with a time constant of 5 ms (middle). Three parameters could be altered (I-E  
83 delay, E input and I/E ratio). Spikes were generated when membrane voltage reached a threshold (bottom). (B.)  
84 Cartoon of monotonic positive and negative responses. Monotonic positive neural responses increase the average  
85 discharge rate for stimuli with higher repetition rate. Monotonic negative responses decrease average discharge  
86 rate for stimuli with higher repetition rate. (C-E.) Examples of simulated neurons. Average discharge rate for  
87 increasing stimuli repetition rate for two example neurons. Model parameters for both neurons are the following:  
88 Neuron example 1 (C.): Excitatory input = 2 nS, Inhibitory input = 10 nS. Neuron example 2 (D.): Excitatory  
89 input = 4.5 nS, Inhibitory input = 8.5 nS. Error bars indicate s.e.m. (E) classification of neuron type across two  
90 parameters (Excitatory input and Inhibitory input) with a fixed I-E delay of 5 ms. The arrows indicate the  
91 parameters used for the example neurons (left arrow for example 1, right arrow for example 2). Shaded area  
92 indicates biologically plausible values where the I/E ratio is between 1.4 and 2.0.

93

## 94 Modelling short-term depression

95 We next examined how the E-I model could be modified to more accurately represent the repetition rate  
96 tuned responses of Sync+ and Sync- neurons. One possible mechanism that can vary discharge rate in a repetition

97 rate sensitive manner is synaptic short-term plasticity, in particular, **short-term depression (STD)**. If such  
98 adaptation is present, real neurons should decrease their firing rate between the start and the end of stimulus  
99 presentation. This difference would be larger for higher repetition rates, and a strong but short-term adaptation  
100 would be able to suppress the activity for high repetition rates without affecting responses for low repetition rates.  
101 Indeed, we observed that the number of spikes in real neurons at each acoustic event showed a decrease between  
102 the start and the end of stimuli sets for both Sync- and Sync+ real neuron populations (Fig.2a-c). Higher repetition  
103 rates showed a larger decrease for Sync- neurons than for lower repetition rates, the largest decrease seen at  
104 48Hz, the upper limit of acoustic flutter (Wilcoxon rank sum test,  $P \ll 0.001$ ), whereas no decrease was observed  
105 at 8Hz, the lower limit of acoustic flutter (Wilcoxon rank sum test,  $P = 0.1$ ) (Fig.2e). Similar to Sync- neurons,  
106 the decrease was present for Sync+ neurons at 48Hz (Wilcoxon rank sum test,  $P = 0.03$ ) and absent at 8Hz  
107 (Wilcoxon rank sum test,  $P = 0.71$ ) (Fig. 2f). When comparing this decrease between Sync- and Sync+ neurons  
108 for the same stimulus, we observed no significant difference for stimuli from 8 to 16Hz, and a significant  
109 difference from 20 to 48Hz (Supp Fig. 2a). Moreover, this depression in the neural response was stronger in the  
110 early portion of the acoustic stimulus (compared to the latter portion), and for Sync- neurons (compared to Sync+  
111 neurons) (Fig.2a, S1 Fig). Sync+ neurons showed a weak global depression throughout stimulus presentation, and  
112 the profile of depression was not affected by repetition rate (Fig.2a, S1 Fig). Finally, the average number of spikes  
113 per acoustic event decreased monotonically (Spearman correlation coefficient: 0.99,  $P < 0.001$ ) for higher  
114 repetition rate in Sync- neurons, but not in Sync+ neurons (Spearman correlation coefficient = 0.36,  $P = 0.36$ .)  
115 (Fig.2d). Together, these observations suggest that adaptation to repeated stimuli was stronger for Sync- neurons  
116 than for Sync+ neurons (S2-S3 Figs)

117

118 **Fig 2. Event-related activity of monotonic Sync neurons.** (A-C.) Normalized number of spikes at each acoustic  
119 event for real Sync- ( $n = 27$ ) and Sync+ ( $n = 26$ ) neurons at 48Hz (a.) 24Hz (B.) and 8Hz (C.). Each data point  
120 was calculated by averaging the number of spikes at the time of each acoustic event (with response latency  
121 considered). Error bars indicate s.e.m. Black bar indicates stimulus presentation period. (D.) Average number of  
122 spikes of real Sync+ and Sync- neurons at each acoustic event across different repetition rates. **Sync+** : Spearman  
123 correlation coefficient = 0.36,  $P = 0.36$  ; **Sync-** : Spearman correlation coefficient: 0.99,  $P < 0.001$ . (E -F.)  
124 adaptation between first and last acoustic event of stimulus for Sync- (E.) and Sync+ (F.) neurons. (E.) adaptation  
125 at 8Hz (Wilcoxon rank sum test,  $P = 0.1$ ), 24Hz (Wilcoxon rank sum test,  $P \ll 0.001$ ), 48Hz (Wilcoxon rank sum  
126 test,  $P \ll 0.001$ ). (F.) adaptation at 8Hz (Wilcoxon rank sum test,  $P = 0.71$ ), 24Hz (Wilcoxon rank sum test,  $P =$   
127 0.01), 48Hz (Wilcoxon rank sum test,  $P = 0.03$ ).

128

129 **Model parameters.** To add short term depression to our previous model, we introduced two additional  
130 parameters; the amplitude of depression ( $A_D$ ) which determined the strength of adaptation after each acoustic  
131 pulse, and the time constant of recovery ( $\tau_p$ ) which controlled how stimulus repetition rate affected adaptation  
132 during stimulus presentation (Fig.3a)(see methods for details). To control the strength of depression in our  
133 modified E-I model, we independently varied these two parameters for both excitatory and inhibitory inputs. We  
134 observed that by varying these two parameters, we were able to produce Sync+ (Spearman correlation coefficient  
135  $\rho > 0.8$ ,  $P < 0.05$ ) and negative ( $\rho < -0.8$ ,  $P < 0.05$ ) responses (Fig.3b-d, see Methods). To further study the effects  
136 of these parameters, we first calculated the probability of obtaining monotonic positive (Fig.3b) or negative  
137 (Fig.3c) neurons across all values of  $A_D$  for a given set of time constants  $\{\tau_{pE}, \tau_{pI}\}$  within a naturalistic range  
138 (between 0.05s and 0.2s). This was determined so that with values in the middle of the range, neurons would show  
139 no or very little depression for repetition rates under 8Hz, which corresponded to a time interval greater than  
140 0.125s between two pulses. The average monotonicity index of model neuron responses across all values of  $A_D$   
141 was highest for high  $\tau_{pI}$  and low  $\tau_{pE}$  values, and lowest for low  $\tau_{pI}$  and high  $\tau_{pE}$  values (Fig.3b-c). For a given  
142 set of time values  $\{\tau_{pE} = 0.15, \tau_{pI} = 0.10\}$  we were able to obtain Sync+ neurons with strong depression and  
143 weak inhibition. The converse was true for Sync- neurons, where depression was stronger for excitation than  
144 inhibition (Fig.3d). In our parameter range, depression of excitation was more important than depression of  
145 inhibition in determining whether a neuron would be monotonic positive or negative. In this computational model,  
146 as in the previous model [15], the initial onset response was determined by the strength of excitation and inhibition,  
147 but not affected by synaptic depression. Values for excitatory and inhibitory input were chosen so that the onset  
148 response was on average between 40 and 60 spikes per second to match onset responses observed in real neurons  
149 [11], although different amplitudes of onset response did not affect our observations (S4 Fig).

150

151 **Fig 3. Computational model of an auditory cortical neuron with short term depression.** (A.) At each acoustic  
152 signal (top) we simulate the decrease in the probability of release of synaptic vesicles with an amplitude of  $A_D$   
153 followed by an exponential recovery with time constant  $\tau_p$  (middle top) (See methods for details). This probability  
154 of release then determined the amplitude of conductance input to our model neuron (middle bottom). a decrease  
155 in conductance amplitude during stimuli presentation (black bar) resulted in a decrease in discharge rate per  
156 acoustic signal (bottom). (B-D.) Adaptation parameter space. Average positive (B.) and negative (C.)  
157 monotonicity index for a given set of recovery time constants  $\{\tau_{pE}, \tau_{pI}\}$ . Average monotonicity index at  $\{\tau_{pE} =$   
158  $0.15, \tau_{pI} = 0.10\}$  for different values of  $A_{DE}$  and  $A_{DI}$  (D.).

159

160 For our simulated neurons,  $A_D$  values were determined so that simulated Sync+ and Sync- neurons  
161 matched real neurons in both trial-by-trial spiking activity (Fig.4) and average population activity (Fig.5).  
162 Monotonicity was significant for both Sync+ (Spearman correlation coefficient  $\rho = 0.91$ ,  $P < 0.001$ ) and Sync- ( $\rho$   
163  $= 0.85$ ,  $P = 0.012$ ) simulated neurons (Fig.5e,f), and temporal fidelity over the range of repetition rates spanning  
164 flutter perception was maintained despite adaptation (Vector Strength (VS) $>0.1$ , and Rayleigh statistic $>13.8$ ,  $P <$   
165  $0.001$ ).

166

167 **Fig 4. Real and Simulated monotonic Sync example neurons.** Raster plot comparison between simulated Sync+  
168 (B;  $A_{DE} = 0.4$ ,  $A_{DI} = 0.1$ ,  $\tau_{pE} = 0.15$  s  $\tau_{pI} = 0.10$  s.) and Sync- (D;  $A_{DE} = 0.1$ ,  $A_{DI} = 0.4$ ,  $\tau_{pE} = 0.15$  s  $\tau_{pI} = 0.10$  s.)  
169 neurons with real Sync+ (C; unit m32q-337) and Sync- (E; unit m32q-29) neuron examples. the black bar indicates  
170 the time during when stimuli was given as input.  $A_{DE} = 0.4$ ,  $A_{DI} = 0.1$ ,  $\tau_{pE} = 0.15$  s  $\tau_{pI} = 0.10$  s.

171 **Fig 5. Monotonicity of real and simulated neurons.** Comparison between simulated and real neuron population  
172 PSTH for Sync+ (A; n = 30, B; n = 26) and Sync- (C; n = 30, D; n = 27) neurons. (E, F.) Normalized discharge  
173 rate for Sync + and Sync- neurons across stimuli with different repetition rates. Discharge rate was normalized to  
174 the maximum value across stimuli. (E.) Population average of real Sync+ and Sync- neurons. (F.) Population  
175 average of simulated Sync+ and Sync- neurons.

176

177 **Model robustness.** Next, we examined the robustness of our model to different types of noise. Our computational  
178 model operated, as did the previous model [15], with a fixed spontaneous rate ( $\sim 4$  spk/s) comparable to that of  
179 our real neuron data (median spontaneous rate = 3.8 spk/s). This was generated by adding Gaussian noise to the  
180 baseline excitatory and inhibitory conductances of the neuron (see methods). Increasing the amplitude of noise  
181 also increased the spontaneous rate (Fig.6a). We examined how robust our model was for varying noise amplitude  
182 and observed that it did not affect monotonicity for both Sync+ and Sync- simulated neurons (Fig.6b). Vector  
183 Strength was less robust to changes in noise amplitude, in particular for Sync- simulated neurons, where low noise  
184 amplitude resulted in a complete lack of stimulus synchrony for high repetition rates (Fig.6d, e), due to the evoked  
185 responses consisting of an onset followed by suppression. Our model also included temporal jitter (Fig.6c) to  
186 emulate more realistic responses, by adding Gaussian noise to the timings of each acoustic pulse. Similar to the  
187 conductance noise amplitude, changes to temporal jitter did not affect monotonicity. We also observed that the  
188 vector strength in Sync- simulated neurons was more affected by temporal jitter than for Sync+ simulated neurons  
189 (Fig 6f, g). However, with the exception of Sync- simulated neurons with strong temporal jitter (above 7 s.d.)  
190 these simulations in the presence of noise could still be classified as synchronised monotonic responses (see  
191 methods for criteria). We further explored model robustness by studying how input parameters such as excitation  
192 and inhibition amplitude affected monotonicity and vector strength. Monotonicity in Sync+ simulated neurons did  
193 not seem to be affected by changes in these parameters (Fig.7a). In Sync- neurons however, the monotonicity  
194 index was reduced to 0 for IE ratios under 1.0 (Fig.7b). In addition, for stronger excitatory input amplitudes the  
195 model required higher IE ratios to produce monotonic negative responses. As for vector strength, both Sync+ and  
196 Sync- simulated neurons showed a weak decrease in stimulus synchrony for excitatory input amplitudes under  
197 2nS (Fig.7c, d).

198

199 **Fig 6. Model robustness.** Spontaneous rate in relation to noise amplitude (A.) Monotonicity in Sync+ and Sync-  
200 neurons in relation to noise amplitude (B.) and temporal jitter (C.) Vector strength in relation to noise amplitude  
201 in Sync+ (D.) and Sync- (E.) neurons, and in relation to temporal jitter in Sync+ (F.) and Sync- (G.) neurons.

202 **Fig 7. Model robustness regarding Excitation and Inhibition amplitude.** Average monotonicity index (A, B.)  
203 and average vector strength (C, D.) across different values for recovery time constants  $\{ \tau_{pE}, \tau_{pI} \}$  ranging  
204 between 0.06 and 0.20s for a given value of  $\{ A_{DE}, A_{DI} \}$ . When within the parameters of producing Sync+ neurons,  
205 Monotonicity is unaffected by changes in E strength and IE ratio (A.). For parameters resulting in Sync- neurons,  
206 Monotonicity is negative only when inhibition is stronger than excitation (IE ratio larger than 1) (B.). Vector  
207 strength is maintained for E strength above 2nS and is minimally affected by IE ratio in both scenarios (C, D.).

208

209 **Different mechanisms for adaptation to repeated acoustic pulses.** So far in this study we explored short-term  
210 depression as a possible underlying mechanism for Sync+ and Sync- neurons observed in A1. Next, we explored  
211 other possible mechanisms that may allow neurons to adapt to acoustic pulse trains and compared their effects to  
212 that of our short-term depression model. One such mechanism is **short-term facilitation (STF)**; the adaptation  
213 of neural activity during stimulus presentation for higher repetition rates could arise from facilitation of inhibition,  
214 as opposed to depression of adaptation. We thus modelled short-term facilitation using the same parameters as  
215 short-term depression. However, instead of decreasing the probability of release (and therefore the conductance  
216 input amplitude), this probability was increased at each acoustic input until it was recovered back to its initial  
217 value (Fig.8) (see methods). When combining depression of excitation and facilitation of inhibition, the model  
218 was able to produce both Sync+ and Sync- responses. Similar to our original model (depression of excitation and  
219 inhibition) depression of excitation was the determining factor for the direction of monotonicity for simulated  
220 neurons (Fig.8a, b). However, increasing the strength of facilitation in the inhibitory input lead to a decrease in  
221 the monotonicity slope of Sync+ neurons and an increase in the monotonicity slope of Sync- neurons. When both  
222 excitation and inhibition were facilitated, all simulated neurons were Sync+ neurons (Fig.8c, d). In the case where  
223 there was strong facilitation of inhibition and weak depression of excitation, our model produced non-monotonic  
224 synchronized responses (highest discharge rates in the middle of the acoustic flutter range).

225

226 **Fig 8. Computational model including short term facilitation.** Short term facilitation was added to the model  
227 by increasing the probability of release (see methods) at each acoustic input, which would decay back to the initial  
228 value with a time constant  $\tau_p$ . Initial probability of release was 0.5 compared to 1.0 in short term depression model  
229 to compensate for changes in conductance input amplitudes. (A, B.) Depression of excitation and facilitation of  
230 inhibition. (C, D.) Facilitation of both excitation and inhibition. (A, C.) average monotonicity index for a given  
231 value of adaptation amplitude  $A_D$ , for time constants  $\{ \tau_{pE}, \tau_{pI} \}$  ranging between 0.06 and 0.20s. (B, D.) discharge  
232 rates for example neurons. (B.) Simulated neurons with depression of excitation and facilitation of inhibition.  
233 Example neuron 1 at  $\{ A_{DE} = 0.1, A_{DI} = -0.0 \}$ , Spearman correlation coefficient = 0.76, P = 0.01. Example  
234 neuron 2 at  $\{ A_{DE} = 0.1, A_{DI} = -0.4 \}$ , Spearman correlation coefficient = 0.25, P = 0.45. Example neuron 3 at  
235  $\{ A_{DE} = 0.3, A_{DI} = -0.0 \}$ , Spearman correlation coefficient = -0.66, P = 0.03 Example neuron 4 at  $\{ A_{DE} = 0.3,$   
236  $A_{DI} = -0.4 \}$ , Spearman correlation coefficient = -0.74, P = 0.01 (D.) Simulated neurons with facilitation of both  
237 excitation and inhibition. Example neuron 1 at  $\{ A_{DE} = -0.2, A_{DI} = -0.2 \}$ , Spearman correlation coefficient = -1,  
238 P << 0.001. Example neuron 2 at  $\{ A_{DE} = -0.0, A_{DI} = -0.4 \}$ , Spearman correlation coefficient = 0.07, P = 0.84.  
239 Time constants of all example neurons:  $\{ \tau_{pE} = 0.15, \tau_{pI} = 0.10 \}$

240

241 Another possible mechanism for adaptation to stimulus statistics is **spike-frequency adaptation (SFA)**.  
242 Although the time scale for SFA is generally much shorter than that of short-term depression [18, 19], the two  
243 effects could be complimentary. In order to separate SFA from our observations, we studied Inter-Spike Intervals  
244 (ISIs) at onset for both Sync+ and Sync- real neurons by comparing the difference between the first and second  
245 ISI and second and third ISI (S5 Fig). Within the same population, we observed a significant difference between  
246 the first, second and third ISI (KS test, P < 0.05), and thus the presence of SFA. However, the time scale of SFA  
247 was in the order of 0.5ms, compared to the time scale of flutter (20 to 250ms). In addition, SFA at the onset

248 between Sync+ and Sync- neurons was significantly different (t-test,  $P < 0.05$ ) but the difference was in the order  
249 of lms.

250 To further compare the aforementioned mechanisms between each other and with real neurons  
251 populations, we studied the strength of adaptation in relation to discharge rate at different time windows during  
252 the stimulus presentation (acoustic pulse train with a repetition rate of 40Hz). The strength of adaptation,  
253 equivalent to the amplitude of adaptation  $A_D$  shown in the model above, was defined as the firing rate during the  
254 time window spanning the given acoustic pulse divided by the firing rate during the previous acoustic pulse. Real  
255 neurons with firing rates lower than the spontaneous rate during the first 2 pulses (5/27 neurons in Sync-, 7/26  
256 neurons in Sync+) were excluded from analysis. The strength of adaptation was also calculated for models with  
257 different mechanisms for adaptation; the base model with STD for excitation and inhibition, the base model with  
258 additional weak or strong SFA (see methods), and the facilitation model with STD for excitation and STF for  
259 inhibition (Fig.9a). As expected, adaptation during the first to second pulse for Sync- simulated neurons was  
260 strongest in the strong SFA model, and weakest in the facilitation model. Adaptation increased significantly  
261 between first to second pulse and first to third pulse for the base model and for the facilitation model (Wilcoxon  
262 sign rank test  $P \ll 0.001$ ) but not for models with weak or strong SFA (Wilcoxon signed rank test  $P = 0.06$  and  $P$   
263  $= 0.5$  respectively). For Sync+ neurons, all models showed a weak or non-significant adaptation. In the case of  
264 real Sync- neurons, most neurons showed significant depression between the first and second pulse (18/22 neurons,  
265 median = 0.59, t-test,  $P \ll 0.001$ ) and between first and third pulse (18/22 neurons, median = 0.90,  $P \ll 0.001$ )  
266 (S6 Fig), and the difference of adaptation strength between these two time windows was statistically significant  
267 (paired Wilcoxon rank sum test,  $P < 0.01$ ) (Fig.9b) these results were most comparable to our base model using  
268 only short-term depression. As for Sync+ neurons, individual responses showed both depression and facilitation  
269 during onset. 9/19 neurons and 8/19 neurons showed depression between 1st and 2nd pulses and between 1st and  
270 3rd pulses respectively (median = 0 for both, Wilcoxon signed rank test,  $P > 0.05$ ) (Fig. 9b). These results showed  
271 that short-term depression was sufficient to reproduce adaptation to acoustic pulse trains in real Sync+ and Sync-  
272 neurons.

273

274 **Fig 9. Adaptation between individual synaptic inputs for real neurons and different models.** (A.) Adaptation  
275 between the 1<sup>st</sup> and 2<sup>nd</sup> input, and between 1<sup>st</sup> and 3<sup>rd</sup> input for Sync+ and Sync- neurons for models with different  
276 adaptation mechanisms. Strength of adaptation increased significantly between 1<sup>st</sup> to 2<sup>nd</sup> pulse and 1<sup>st</sup> to 3<sup>rd</sup> pulse  
277 for Sync- base and facilitation model (paired Wilcoxon signed rank test  $P \ll 0.001$ ) (B.) Strength of adaptation  
278 in real Sync+ and Sync- neurons between the 1<sup>st</sup> and 2<sup>nd</sup> input, and between 1<sup>st</sup> and 3<sup>rd</sup> input. Strength of adaptation  
279 increased significantly between 1<sup>st</sup> to 2<sup>nd</sup> pulse and 1<sup>st</sup> to 3<sup>rd</sup> pulse for Sync- neurons (Wilcoxon signed rank test  
280  $P < 0.01$ ). Asterisks directly above bars indicate that the adaptation amplitude was significantly different from 0  
281 (Wilcoxon signed rank test  $P < 0.05$ ).

282

283 **Response to pure tones.** If we consider pure tones to be similar to acoustic pulse trains with a very high repetition  
284 rate, the responses these stimuli evoke in Sync+ neurons and Sync- neurons would be different. We would more  
285 likely observe a brief onset response in Sync- neurons compared to a more sustained response observed in sync+  
286 neurons. Using our computational model, we could also emulate responses of Sync+ and Sync- neurons to  
287 different sets of stimuli such as pure tones. In real neurons, similar responses were evoked by pure tones (at the  
288 neuron's best frequency) and pulse trains with high repetition rates (Fig.10a): We observed an onset followed by  
289 a sustained response for Sync+ neurons and an onset followed by a suppressed response for Sync- neurons. Both  
290 our computational model for Sync+ and Sync- neurons behaved similarly to real neurons (Fig.10b), with Sync-  
291 simulated neurons showing a transient onset followed by suppressed response, whereas Sync+ showed a sustained  
292 response during stimulus. Our simulated responses to pure tones did however differ with real neuron response  
293 dynamics (S7 Fig). Sync + responses were greatly exaggerated in our simulated neurons compared to real neurons,  
294 with the peak response time being significantly later than onset response time. Decreasing the initial excitatory  
295 input amplitude or introducing SFA to the model seem to affect Sync- responses, however increasing the excitation  
296 strength led to a proportional increase in onset response (S8 Fig). These data suggest that the temporal profile of  
297 pure-tone responses could be used to predict whether a neuron is Sync+ or Sync-, even though actual firing rates  
298 of the base model did not accurately reflect real neuronal responses. We tested this prediction by measuring the  
299 median of all spike times during stimulus presentation of pure tone responses in real and simulated neurons:  
300 Neurons with sustained responses would have a higher median spike time during stimulus presentation than those  
301 showing onset responses. This was indeed the case for both real neuron populations (Fig.10c) (median spike time

302 of Sync+ neurons = 89ms, median spike time of Sync- neurons 44ms, Wilcoxon rank sum test,  $P < 0.05$ ) and  
303 simulated neurons (S8 Fig). Results for Sync+ simulated neurons suggest that median spike times during the  
304 stimulus varies depending on the strength of adaptation whereas for Sync- neurons it stays constant. This could  
305 explain the variation of median spike times in real Sync+ neurons compared to Sync- neurons (Fig.10c).

306

307 **Fig 10. Pure tone responses.** Normalized responses to pure tones in real (A; Sync +,  $n = 26$ . Sync-,  $n = 27$ ) and  
308 simulated neurons (30 simulated neurons). Normalized spike rate was obtained by dividing the population average  
309 response to the average peak response during stimulus presentation. (C.) Distribution of median spike times during  
310 stimuli presentation of all Sync+ neurons (green asterisk: median of distribution= 89ms) and Sync- neurons  
311 (yellow asterisk: median of distribution= 44ms). The two distributions were significantly different (Wilcoxon rank  
312 sum test,  $P < 0.001$ ).

313

314 **Encoding and decoding multiple acoustic features.** Sync+ and Sync- neurons dually represent the repetition  
315 rate of acoustic flutter through monotonic discharge rate and through stimulus-synchronized activity [11].  
316 However, how downstream neurons read out this information, especially in the context of additional concurrently  
317 encoded acoustic parameters is unknown. To further explore this issue, we added a monotonic modulation of  
318 firing rate in our model, to reflect a stimulus' sound level [12,20,21] and emulate multiplexing of different acoustic  
319 features in firing rate. Our Sync+ and Sync- neurons therefore varied their firing rates to both stimulus repetition  
320 rate and sound amplitude (Fig.11b, c). We speculated that these two parameters could be “demultiplexed” by  
321 simply adding or subtracting Sync+ and Sync- responses from each other. Subtracting Sync- responses from  
322 Sync+ responses, generated a firing rate that was insensitive to changes in stimulus amplitude, providing a robust  
323 monotonic change in firing rate to repetition rate (Fig.11d, e). Using the opposite approach and summing Sync+  
324 and Sync- responses created an invariant response to repetition rate while preserving the monotonic tuning to  
325 stimulus amplitude (Fig.11f, g).

326

327 **Fig 11. Opponent coding with Sync+ and Sync- neurons.** (A.) Cartoon of the effect of stimulus amplitude to  
328 Sync+ and Sync- tuning curves in relation to stimulus repetition rate. Higher sound levels shift the tuning curves  
329 towards higher firing rates. (B, C.) Normalized firing rate for a given stimulus with two varying parameters,  
330 stimulus amplitude and stimulus repetition rate for Sync+ and Sync- simulated neurons respectively. Cartoon (D.)  
331 and model output (E.) illustrating tuning curves in relation to stimulus repetition rate and amplitude when  
332 subtracting Sync- responses from Sync+ responses. Changes in activity reflects changes in repetition rate but not  
333 in stimulus amplitude. Cartoon (F.) and model output (G.) illustrating tuning curves in relation to stimulus  
334 repetition rate and amplitude when adding Sync- responses to Sync+ responses. Changes in activity reflects  
335 changes in stimulus amplitude but not in repetition rate.

336

337 We quantified this further by comparing the mutual information (MI) between firing rate and each  
338 stimulus feature with our simulations. We observed that subtracting Sync- responses from Sync+ responses  
339 resulted in the most MI regarding stimulus repetition rate (Fig.12a), while having the least MI for stimulus  
340 amplitude, compared to other combinations (Fig.12b). This demonstrates that the difference in firing rates between  
341 Sync+ and Sync- neurons preserves the rate code for stimulus repetition rate while ignoring stimulus amplitude.  
342 Furthermore, MI for stimulus repetition rate was significantly higher when subtracting Sync- responses from  
343 Sync+ responses than only using Sync+ neurons, suggesting that this “demultiplexing” procedure can even lead  
344 to an enhancement of the rate code. If instead we summed the Sync+ and Sync- responses, we observed the  
345 opposite result- MI increased for stimulus amplitude and decreased for stimulus repetition rate. Thus the  
346 summation of firing rates between Sync+ and Sync- neurons preserves the rate code for stimulus amplitude while  
347 ignoring stimulus repetition rate. Altogether, these results indicate that more than one acoustic feature can be  
348 multiplexed together, by concurrently encoding each feature using a monotonically tuned rate code. However, it  
349 is critical to have both positive and negative monotonic tuning to at least one acoustic feature for this to work.  
350 Demultiplexing this information downstream only requires summing or subtracting firing rates between different  
351 groups of neurons, which is both mechanistically simple and biologically plausible.

352

353 **Fig 12. Mutual information and opponent coding.** Mutual information (MI) between firing rate each stimulus  
354 feature: repetition rate (A.) and stimulus amplitude (B.) Mutual information was calculated (see methods) with  
355 different combinations of model neurons that had randomly distributed amplitude modulations added to their  
356 discharge rate. All categories were significantly different from each other (Kruskal-Wallis test with a post-hoc  
357 Wilcoxon rank sum test with Bonferroni correction)

358

## 359 Discussion

360 Here we describe a computational model able to reproduce the monotonically-tuned synchronized  
361 responses of auditory cortex neurons evoked by acoustic pulse trains in the range of flutter perception. By adding  
362 the parameters of pre-synaptic short-term depression to both the excitatory and inhibitory inputs of the initial  
363 conductance-based integrate-and-fire E-I model [15] we were able to model both positive and negative  
364 monotonically tuned, stimulus synchronized neurons (Sync+ and Sync-). Sync+ responses were generated when  
365 adaptation for excitation was weak or not present, whereas Sync- responses were generated when adaptation for  
366 excitation was strong. Adaptation of inhibition played a role in facilitating or suppressing post-synaptic responses.  
367 This adaptation was modelled using a realistic set of time constants and rates of adaptation, consistent with  
368 previous studies across multiple laboratories [6,22,23-27]. When compared with other possible mechanisms for  
369 adaptation such as pre-synaptic short-term facilitation and post-synaptic spike-frequency adaptation, our model  
370 best emulated adaptation of real Sync+ and Sync- neurons to acoustic pulse trains in the perceptual range of flutter  
371 and was also able to make testable predictions such as temporal dynamics of responses to pure-tones, which was  
372 subsequently confirmed in our real neuronal population.

373 With this model, we were able to further explore the role of monotonic positive and negative encoding  
374 neurons in the auditory cortex. Multiple stimulus features other than repetition rate such as sound level [12] and  
375 sound source location [28] have shown monotonic rate coding. We demonstrated that the “segregation problem”  
376 of multiple stimulus features could be solved if one or more features were encoded by monotonic positive and  
377 negative rate code tuning. This “opponent coding” would isolate information originating from one feature from  
378 others. Although here we simulated Sync+ and Sync- neurons in auditory cortex, opponent coding of temporally  
379 modulated information has also previously been reported in the Secondary somatosensory cortex (S2) [29] for  
380 vibro-tactile stimuli.

381 Although primary somatosensory [8] and auditory cortices encode stimulus timing using both a rate and  
382 temporal representation, downstream neurons may only be processing one of these inputs. Mountcastle and  
383 colleagues [30] previously postulated that a neural mechanism could read out the periodic inter-spike intervals of  
384 the spike trains evoked in S1. In anesthetized animals, ISI does contain by far the highest amount of information,  
385 assisted by information from firing rate [31]. However multiple studies in awake animals [29,32-34] in both  
386 sensory areas have shown that firing rate, not precise spike timing, more accurately represents the psychophysical  
387 discrimination thresholds of stimulus repetition rate.

388 In the auditory pathway, we observe a loss of temporal fidelity to repetitive stimuli as we move along  
389 from the auditory periphery to cortex (e.g., cochlear nucleus: [35-38], inferior colliculus: [39-41] medial  
390 geniculate body: [23,42], auditory cortex: [8,9,43-45]) due to biophysical properties of neurons and temporal  
391 integration of converging inputs from one level to the next [37]. This loss of temporal fidelity in the auditory  
392 cortex, while problematic for a temporal representation, is mitigated by the substitution of a rate code for encoding  
393 the same information. Thalamic and prethalamic areas in the auditory pathway contain predominately  
394 synchronized neurons, while non-synchronized (nSync) neurons using firing rate to encode temporal information  
395 for repetition rates above the upper limit of flutter are most prevalent in auditory cortex (and to a limited extent  
396 the medial geniculate nucleus (MGB)) [42]. Both Sync and nSync neurons responding to flutter were found in A1  
397 and in the Rostral fields (R and RT), although a higher proportion of Sync+/- neurons were found in A1, compared  
398 to R and RT where there were more nSync+/- neurons (monotonically encoding repetition rates within the range  
399 of flutter perception). Similar transformations were found in the Somatosensory pathway from Thalamus to S1,  
400 S2 [29] where, in the same manner as the auditory cortex, S2 neurons showed a much weaker stimulus-locking  
401 than S1 for vibrotactile stimuli and encoded temporal information using either positive or negative monotonic rate



402 codes. Previous studies have suggested single-compartment computational models to explain this transformation  
403 of temporal encoding across the auditory system [15,22,46,47], but all of these studies have grouped synchronized  
404 neurons in a single rate-coding category, not distinguishing between positive/negative monotonic neurons. We  
405 postulate that monotonic synchronized neurons are an intermediary stage in the transformation of stimulus  
406 information encoding from a temporal representation to a rate code lacking stimulus locked responses.

407 There are, however, several caveats to our computational model. First, we compare single unit data from  
408 marmosets with simulated neurons using cellular parameters based on intra-cellular recordings of ketamine-  
409 anesthetized rats [22], due to the fact that no data exists for marmosets. Because ketamine is an NMDA antagonist,  
410 our model only simulated AMPA and GABA-A receptors, making no distinction between the two. NMDA  
411 receptors produce synaptic inputs with a longer time-constant (10-25ms) than AMPA and GABA-A receptors  
412 (5ms) and may thus explain the difference in response between awake and anesthetized animals. Previous studies  
413 have introduced NMDA receptors to single compartment models [15,46,47], but none have studied how it affects  
414 the monotonicity of synchronized responses.

415 Alongside acoustic pulse trains, Bendor and Wang [11,48,49] also recorded responses of the same  
416 neurons to sinusoidal amplitude modulated (SAM) tones and to pure tones. In the current model, an acoustic pulse  
417 is modelled as a single excitatory gaussian kernel followed by an inhibitory kernel. SAM tones have different  
418 spectral bandwidth and pulse duration depending on the modulation frequency [34] and cannot be represented  
419 accurately by our model. As for pure tone responses, our model represents the input as a net onset excitation  
420 followed by inhibition during stimulus presentation. Our model also considers that A1 neurons receive the same  
421 excitatory and inhibitory conductance input for each acoustic pulse regardless of the repetition rate. However,  
422 both in vitro [50] and in silico [46] studies show evidence for short-term plasticity to repetitive acoustic stimuli  
423 for projections from Inferior Colliculus (IC) to MGB neurons. Inputs to A1 neurons originating from acoustic  
424 pulses would have therefore passed such filters. While the addition of parameters that account for these different  
425 types of stimuli and transformations could provide further improvements to the model, our aim was to demonstrate  
426 that the addition of adaptation to a simple computational model is sufficient to produce positive and negative  
427 monotonic rate coding in stimulus-synchronizing neurons.

428

## 429 **Methods**

430 **Ethics Statement.** The electrophysiology data used in this study comprised of a previous published dataset [11]  
431 collected in the laboratory of Professor Xiaoqin Wang at Johns Hopkins University. All experimental procedures  
432 were approved by the Johns Hopkins University Animal Use and Care Committee and followed US National  
433 Institutes of Health guidelines.

434

435 **Electrophysiological recordings and acoustic stimuli.** Our electrophysiology data in this report comprised of  
436 previous published datasets [11]. For these datasets, the authors performed single-unit recordings with high-  
437 impedance tungsten micro-electrodes (2–5M $\Omega$ ) in the auditory cortex of four awake, semi-restrained common  
438 marmosets (*Callithrix jacchus*).

439 Action potentials were sorted on-line using a template-matching method (MSD, Alpha Omega  
440 Engineering). Experiments were conducted in a double-walled, soundproof chamber (Industrial Acoustic Co.,  
441 Inc.) with 3-inch acoustic absorption foams covering each inner wall (Sonex, Illbruck, Inc.).

442 Acoustic stimuli were generated digitally (MATLAB- custom software, Tucker Davis Technologies) and  
443 delivered by a free-field speaker located 1 meter in front of the animal. Recordings were made primarily for the  
444 three core fields of auditory cortex (177/210 neurons)- primary auditory cortex (AI), the rostral field (R), and the  
445 rostromedial field (RT), with the remaining neurons recorded from surrounding belt fields. For each single unit  
446 isolated, the best frequency (BF) and sound level threshold was first measured, using pure tone stimuli that were  
447 200 ms in duration. We next generated a set of acoustic pulse trains, where each pulse was generated by  
448 windowing a brief tone at the BF by a Gaussian envelope. Repetition rates ranged from 4Hz to 48Hz (in 4Hz  
449 steps) Acoustic pulse train stimuli were 500 ms in duration, and all intertrial intervals were at least 1 s long. Each  
450 stimulus was presented in a randomly shuffled order with other stimuli, and repeated at least five times for all  
451 neurons, and at least ten times for about 55% of neurons (115/210). Stimulus intensity levels for acoustic pulse

452 trains were generally 10 – 30 dB above BF-tone thresholds for neurons with monotonic rate-level functions and  
 453 at the preferred sound level for neurons with non-monotonic rate-level functions.

454

## 455 **Computational model**

### 456 **Single neuron model.**

457 The single unit model used in this study was based on the model published by Bendor 2015 [15]. A  
 458 conductance-based leaky integrate-and-fire model was simulated using MATLAB using the following equation,  
 459 using parameters obtained from Wehr and Zador 2003 [17]:

$$460 \quad V_{t+1} = -\frac{dt}{C} [g_e(t)(V_t - E_e) + g_i(t)(V_t - E_i) + g_{rest}(t)(V_t - E_{rest})] + V_t + \sigma_s \omega_n \sqrt{\Delta t}$$

461 Each acoustic pulse was simulated as the summation of 10 excitatory and 10 inhibitory synaptic inputs  
 462 [20], each temporally jittered (Gaussian distribution,  $\sigma = 1$  ms). Each synaptic input was modelled as a time-  
 463 varying conductance fit to an alpha function:

$$464 \quad \alpha(t) = A(t)te^{-\frac{t}{\tau_s}}$$

465 When simulating neurons without short-term plasticity,  $A$  was determined by the excitatory or inhibitory  
 466 input parameter and stayed constant throughout the simulation. This amplitude ranged between 0 to 6nS for  
 467 excitatory inputs and 0 to 12nS for inhibitory inputs, as in Bendor 2015 [11]. A synaptic input delay was added  
 468 to simulate the delay between peripheral auditory system and auditory cortex, and whereas in the previous study  
 469 the temporal delay between excitatory and inhibitory inputs (I-E delay) was a variable, in this study it was fixed  
 470 at 5 ms. In our model, an action potential occurred whenever the membrane potential of the model neuron reached  
 471 a threshold value  $V_{th}$ . After the action potential, the potential was reset to a value  $E_{rest}$  below the threshold  
 472 potential,  $E_{rest} < V_{th}$ .

473

474 **Table 1. Fixed model parameters.**

|                               |            |                     |
|-------------------------------|------------|---------------------|
| Membrane capacitance          | $C$        | 0.25nF              |
| Leak membrane conductance     | $g_{rest}$ | 25nS                |
| Excitatory reversal potential | $E_e$      | 0mV                 |
| Inhibitory reversal potential | $E_i$      | -85mV               |
| Alpha function time constant  | $\tau_s$   | 5ms                 |
| Synaptic input delay          |            | 10ms                |
| I-E delay                     |            | 0.1ms               |
| Simulation timestep           | $\Delta t$ | 10mVs <sup>-1</sup> |
| Scale of noise                | $\sigma_s$ | [-1 :1]             |
| Gaussian noise                | $\omega_n$ |                     |

475

476 **Short-term plasticity: Depression.** In order to introduce short-term plasticity in the model we regarded the  
 477 probability of presynaptic release  $P_{rel}$  as a dynamic variable depending on the input stimuli (acoustic pulse trains)  
 478 [51,52]. In the absence of presynaptic activity, the release probability decays exponentially back to its initial value  
 479  $P_0$  with the following equation:

$$480 \quad \tau_p \frac{dP_{rel}}{dt} = P_0 - P_{rel}(t)$$

481 Immediately after each stimulus input the release probability is reduced.

$$482 \quad P_{rel}(t) \rightarrow (1 - A_D) * P_{rel}(t)$$

$$483 \quad A(t) = A(0) * P_{rel}(t)$$

484 Where  $A_D$  controls the amount of depression and  $A(t)$  is the amplitude of conductance input at time  $t$ .  
485 Modelling synaptic depression consisted thus of 4 parameters: the recovery time constants for both excitatory and  
486 inhibitory synapses ( $\tau_{pE}, \tau_{pI}$ ) ranging from 50 to 200ms, and the depression factor  $A_{DE}$  and  $A_{DI}$  ranging from 0  
487 to 0.5.  $P_0$  in this model was equal to 1. These values were consistent with intra-cellular recordings in previous  
488 studies [26,52].

489

490 **Short-term plasticity: Facilitation.** Short-term facilitation was added to the model using a similar model to that  
491 of short-term depression. In the case of facilitation,  $A_D$  varies between -0.5 and 0. Therefore, the probability of  
492 release  $P_{rel}(t)$  increases after each stimulus input, then decays back to the initial value. When modelling  
493 facilitation  $P_0$  was equal to 0.5 so that the resulting amplitude of conductance remained comparable to that of  
494 short-term depression.

495

496 **Spike-Frequency Adaptation.** We modelled spike-frequency adaptation by including an addition current in the  
497 model.

498 
$$V_{t+1} = -\frac{dt}{C} [g_e(t)(V_t - E_e) + g_i(t)(V_t - E_i) + g_{rest}(t)(V_t - E_{rest}) + g_{sra}(t)(V_t - E_K) + V_t + \sigma_s \omega_n \sqrt{\Delta t}]$$

499 Where  $g_{sra}$  is the spike-frequency adaptation conductance modelled as a  $K^+$  conductance [53]. When  
500 activated, this will hyperpolarize the neuron, slowing any spiking that may be occurring. The conductance relaxes  
501 to zero exponentially with the time constant  $\tau_{sra}$  through the following equation:

502 
$$\tau_{sra} \frac{dg_{sra}}{dt} = -g_{sra}$$

503 Whenever the neuron fires a spike,  $g_{sra}$  is increased by an amount  $\Delta g_{sra}$ , causing the firing rate to adapt  
504 in a sequence of steps in relation to the neurons spiking activity.

505

## 506 Data analysis

507 **Classification of neurons, Synchrony.** Two tests were used to determine whether a neuron was Sync or nSync:  
508 Vector strength (VS) and rate response. **Vector strength** (VS) was calculated for each repetition rate from 8 to  
509 48Hz with the following equation:

510 
$$VS = \frac{1}{N} \sqrt{\sin\left(\frac{2\pi t^{(n)}}{IPI}\right)^2 + \cos\left(\frac{2\pi t^{(n)}}{IPI}\right)^2}$$

511 
$$RS = 2 * N * VS^2$$

512 Where  $N$  is the number of spikes,  $t^{(n)}$  is the time of  $n^{th}$  pulse and  $IPI$  the interpulse interval. If vector  
513 strength was significant (Rayleigh statistic  $RS > 13.8$ ) and above 0.1 for three consecutive repetition rates, and if  
514 the rate response was also considered significant (average discharge rate 2 s.d. above the mean spontaneous rate  
515 and an average of more than 1 spike per stimulus), then the neuron was considered Sync. If the rate response was  
516 significant but the neuron did not pass the synchrony criteria, it was considered nSync. In our dataset 125/210  
517 neurons were classified as Sync.

518 **Classification of neurons, Monotonicity.** The monotonicity of the discharge rate for a given repetition rate was  
519 determined by calculating the Spearman correlation coefficient ( $\rho$ ) for stimuli spanning from 8 to 48Hz. If  
520 coefficient was larger than 0.8 and statistically significant (p-value  $< 0.05$ ) the neuron was considered positive  
521 monotonic. If the coefficient was smaller than -0.8 and statistically significant, the neuron was considered negative  
522 monotonic. Neurons satisfying neither of these criteria were considered non-monotonic. These three classification  
523 methods applied to both real and simulated neurons. In our dataset of real neurons, we found 126/210 monotonic  
524 neurons and 84 non-monotonic neurons.

525

526 **Classification of neurons, Sync+ and Sync- neurons.** Based on the two classification criteria, we classified 25  
527 Sync+ and 27 Sync- neurons with significant stimuli-driven responses.

528

529 **PSTH.** Individual peri-stimulus time histograms (PSTHs) were calculated by convolving a Gaussian kernel ( $\sigma =$   
530 10ms) with a neuron spike train. The population PSTH was calculated as a mean of individual PSTHs.

531

532 **Mutual information analysis.** The MI of stimulus frequency carried in the firing rate was computed for all Sync  
533 neurons across all stimuli. MI between frequency  $f$  and firing rate  $fr$  is given by the equation

534 
$$I(f, fr) = \frac{1}{N_f} \sum_r p(fr|f) \log_2 \frac{P(fr|f)}{P(fr)}$$

535 Where  $N_f = 12$  s the number of stimulus frequencies. To account for the fact that MI is positively biased  
536 [54-55], the values were linearly extrapolated to a resolution of 1 spike/second. MI between repetition rate and  
537 VS was evaluated in the same manner. VS values were calculated for each stimulus presentation to form  
538 distribution of VS values for each neuron for each trial. trials with non-significant VS values were assigned a MI  
539 value of zero bits/stimulus. In the case of ISI, the distribution of ISIs was calculated for each repetition rate, and  
540 linearly extrapolated to form a distribution with a resolution of 1ms.

541

542

## 543 **Acknowledgements:**

544 **Funding:** This research was funded by a Medical Research Council Grant (MR/M022889/1) and a European  
545 Research Council Starter Grant (CHIME) to DB. The funders had no role in study design, data collection and  
546 analysis, decision to publish, or preparation of the manuscript.

547 The authors thank Catherine Perrodin and James Cooke for comments and suggestions related to this manuscript.

548

## 549 **References**

- 550 1. Peretz I, Zatorre RJ. Brain organization for music processing. *Annu. Rev. Psychol.* 2005; 56: 89–114.  
551 PMID: 15709930
- 552 2. Geiser E, Walker KM, Bendor D. Global timing: a conceptual framework to investigate the neural basis  
553 of rhythm perception in humans and non-human species. *Frontiers in psychology.* 2014; 5. doi: 10.  
554 3389/fpsyg.2014.00005 PMID: 24478738
- 555 3. Rosen S. Temporal information in speech: acoustic, auditory and linguistic aspects. *Philos. Trans. R. Soc.*  
556 *Lond. B Biol. Sci.* 1992; 336, 367–373.
- 557 4. Large EW, Palmer C. Perceiving temporal regularity in music. *Cognitive Science* 2002; 26:1-37.
- 558 5. Singh NC, Theunissen FE. Modulation spectra of natural sounds and ethological theories of auditory  
559 processing. *J. Acoust. Soc. Am.* 2003; 114, 3394–3411.
- 560 6. De Ribaupierre F, Goldstein MH, Jr., Yeni-Komshian G. Cortical coding of repetitive acoustic pulses.  
561 *Brain Res.* 2003; 48: 205–225.
- 562 7. Gaese BH, Ostwald J. Complexity and temporal dynamics of frequency coding in the awake rat auditory  
563 cortex. *Eur J Neurosci.* 2003; 18: 2638–2652.
- 564 8. Lu T, Wang X. Temporal discharge patterns evoked by rapid sequences of wide- and narrowband clicks  
565 in the primary auditory cortex of cat. *J Neurophysiol.* 2000; 84: 236–246.
- 566 9. Lu, T, Liang L, Wang X. Temporal and rate representations of time-varying signals in the auditory cortex  
567 of awake primates. *Nature Neuroscience* 2000; 4:1131-1138.
- 568 10. Malone BJ, Scott BH, Semple MN. Dynamic amplitude coding in the auditory cortex of awake rhesus  
569 macaques. *J Neurophysiol* 2007; 98: 1451–1474.
- 570 11. Bendor D, Wang X. Differential neural coding of acoustic flutter within primate auditory cortex. *Nat.*  
571 *Neurosci.* 2007; 10, 763–771.
- 572 12. Sadagopan S and Wang X. Level Invariant Representation of Sounds by Populations of Neurons in  
573 Primary Auditory Cortex. *J. Neurosci.* 2008; 28: 3415-3426.
- 574 13. Stecker GC, Harrington IA, Middlebrooks JC. Location coding by opponent neural populations in the  
575 auditory cortex. *PLoS Biol.* 2005; 3(3):e78.
- 576 14. Romo R, Salinas E. Flutter discrimination: neural codes, perception, memory and decision making. *Nat*  
577 *Rev Neurosci.* 2003; 4(3):203-18.
- 578 15. Bendor D. The role of inhibition in a computational model of an auditory cortical neuron during the  
579 encoding of temporal information. *PLoS Comput. Biol.* 2015; 11, e1004197.
- 580 16. Gao L, Kostlan K, Wang Y, Wang X. Distinct Subthreshold Mechanisms Underlying Rate-Coding  
581 Principles in Primate Auditory Cortex. *Neuron* 2016; 91, 905919.
- 582 17. Wehr M, Zador AM. Balanced inhibition underlies tuning and sharpens spike timing in auditory cortex.  
583 *Nature.* 2003; 426(6965): 442–446.
- 584 18. Madison D, Nicoll R. Control of the repetitive discharge of rat CA1 pyramidal neurones in vitro. *J*  
585 *Neurophysiol.* 1984; 354: 319.
- 586 19. Tsodyks MV and Markram H. The Neural Code between Neocortical Pyramidal Neurons Depends on  
587 Neurotransmitter Release Probability. *PNAS.* 1997; 94, 719-723.
- 588 20. Phillips DP. Neural representation of sound amplitude in the auditory cortex: effects of noise masking.  
589 *Behav Brain Res.* 1990 Mar 26;37(3):197-214.

- 590 21. Watkins PV and Barbour DL. Level-Tuned Neurons in Primary Auditory Cortex Adapt Differently to  
591 Loud versus Soft Sounds. *Cereb Cortex*. 2011 Jan; 21(1): 178–190.
- 592 22. Gao X, Wehr M. A coding transformation for temporally structured sounds within auditory cortical  
593 neurons. *Neuron* 2015; 86, 292–303.
- 594 23. De Ribaupierre F, Goldstein MH, Yeni-Komshian G. Intracellular study of the cat's primary auditory  
595 cortex. *Brain research*. 1972; 48: 185204.
- 596 24. Ojima H, Murakami K. Intracellular characterization of suppressive responses in supragranular  
597 pyramidal neurons of cat primary auditory cortex in vivo. *Cerebral Cortex*. 2002 ; 12(10): 10791091.
- 598 25. Zhou M, Liang F, Xiong XR, Li L, Li H, Xiao Z, et al. Scaling down of balanced excitation and inhibition  
599 by active behavioral states in auditory cortex. *Nature neuroscience*. 2014; 17(6): 842850.
- 600 26. David SV, Shamma SA. Integration over multiple timescales in primary auditory cortex. *J Neurosci*.  
601 2013; 33:19154 19166
- 602 27. Joris PX, Schreiner CE, Rees A. Neural processing of amplitude-modulated sounds. *Physiol. Rev.* 2004;  
603 84, 541577.
- 604 28. Kaas JH, Hackett TA. Subdivisions of auditory cortex and processing streams in primates. *PNAS* 2000;  
605 97(22):11793-9.
- 606 29. Lemus L, Hernández A, Romo R. Neural codes for perceptual discrimination of acoustic flutter in the  
607 primate auditory cortex. *PNAS* 2009; 106(23), 9471–9476.
- 608 30. Mountcastle VB, Steinmetz MA, Romo R. Frequency discrimination in the sense of flutter:  
609 psychophysical measurements correlated with postcentral events in behaving monkeys. *J Neurosci*. 1990  
610 Sep;10(9):3032-44.
- 611 31. Imaizumi K, Priebe NJ, Sharpee TO, Cheung SW, Schreiner CE. Encoding of Temporal Information by  
612 Timing, Rate, and Place in Cat Auditory Cortex. *PLoS ONE* 2010; 5(7): e11531.
- 613 32. Salinas E, Hernandez A, Zainos A, Romo R. Periodicity and firing rate as candidate neural codes for the  
614 frequency of vibrotactile stimuli. *J. Neurosci*. 2000; 20, 5503–5515.
- 615 33. Romo R, Salinas E. Flutter discrimination: neural codes, perception, memory and decision making. *Nat*  
616 *Rev Neurosci*. 2003; 4(3):203-18.
- 617 34. Atiani S, David V, Elgueda D, Locastro M, Radtke-Schuller S, Shamma SA, Fritz, J B. Emergent  
618 selectivity for task-relevant stimuli in higher-order auditory cortex. *Neuron* 2014; 82(2), 486–499.
- 619 35. Blackburn CC, Sachs MB. Classification of unit types in the anteroventral cochlear nucleus: PST  
620 histograms and regularity analysis. *J Neurophysiol*. 1989; 62(6):1303-29.
- 621 36. Frisina RD, Smith RL, Chamberlain SC. Encoding of amplitude modulation in the gerbil cochlear  
622 nucleus: II. Possible neural mechanisms. *Hear Res*. 1990; 44(2-3):123-41.
- 623 37. Wang X, Sachs MB. Neural encoding of single-formant stimuli in the cat II. Responses of anteroventral  
624 cochlear nucleus units. *J Neurophysiol*. 1994; 71:59–78.
- 625 38. Rhode WS and Greenberg SR. Encoding of amplitude modulation in the cochlear nucleus of the cat. *J*  
626 *Neurophysiol*. 1994; 71:1797-1825.
- 627 39. Langner G and Schreiner CE. Periodicity coding in the inferior colliculus of the cat. I. Neuronal  
628 mechanisms. *J Neurophysiol*. 1988; 60(6):1799-822.
- 629 40. Batra R, Kuwada S, Stanford TR. Temporal coding of envelopes and their interaural delays in the inferior  
630 colliculus of the unanesthetized rabbit. *J Neurophysiol*. 1989; 61:257–268.
- 631 41. Muller-Preuss P, Flachskamm C, Bieser A. Neural encoding of amplitude modulation within the auditory  
632 midbrain of squirrel monkeys. *Hear Res*. 1994; 80:197–208.

- 633 42 Bartlett EL, Wang X. Neural Representations of Temporally-Modulated Signals in the Auditory  
634 Thalamus of Awake Primates. *J Neurophysiol.* 2007; 97:1005–1017.
- 635 43. Schreiner CE, Urbas JV. Representation of amplitude modulation in the auditory cortex of the cat. II  
636 Comparison between cortical fields. *Hear Res.* 1988; 32(1):49–63. [
- 637 44. Eggermont JJ. Rate and synchronization measures of periodicity coding in cat primary auditory cortex.  
638 *Hear Res.* 1991;56(1–2):153–67.
- 639 45. Eggermont JJ. Temporal modulation transfer functions for AM and FM stimuli in cat auditory cortex.  
640 Effects of carrier type, modulating waveform and intensity. *Hear Res.* 1994;74(1–2):51–66.
- 641 46. Rabang CF, Bartlett EL. A computational model of cellular mechanisms of temporal coding in the medi-  
642 al geniculate body (MGB). *PloS one.* 2011; 6(12): e29375.
- 643 47. Levy RB, Reyes AD. Coexistence of lateral and co-tuned inhibitory configurations in cortical networks.  
644 *PLoS comput. biol.* 2011; 7(10): e1002161.
- 645 48. Bendor, D., & Wang, X. (2008). Neural response properties of primary, rostral, and rostromedial core  
646 fields in the auditory cortex of marmoset monkeys. *Journal of neurophysiology*, 100(2), 888-906.
- 647 49. Bendor D, Wang X. Neural coding of periodicity in marmoset auditory cortex. *J. Neurophysiol.* 2010;  
648 103(4):1809-22.
- 649 50. Kreeger L, Mehta P, Zemelman BV, Golding NL. Cholecystokinin neurons of the inferior colliculus  
650 provide direct and powerful excitation and inhibition to the medial geniculate body of the gerbil. 2018;  
651 Program No. 573.24. 2018 Neuroscience Meeting Planner. San Diego, CA: Society for Neuroscience.
- 652 51. Tsodyks MV, Markram H. Plasticity of neocortical synapses enables transitions between rate and  
653 temporal coding. *Lect. Notes Comput. Sci.*, 1996; 1112,445450.
- 654 52. Abbott LF, Varela JA, Sen K, Nelson SB. Synaptic depression and cortical gain control. *Science* 1997;  
655 275, 220224.
- 656 53. Dayan P and Abbott LF. *Theoretical Neuroscience: Computational and Mathematical Modeling of*  
657 *Neural Systems.* The MIT Press 2005.
- 658 54. Strong SP, Koberle R, van Steveninck RRD, Bialek W. Entropy and information in neural spike trains.  
659 *Phys Rev Let* 1998; 80: 197–200.
- 660 55. Cliff AD, Ord JK. *Spatial autocorrelation.* London: Pion. 1973; 178 p.

661

662

## 663 **Supporting information**

664 **S1 Fig. Adaptation to stimulus pulse trains in Sync+ and Sync- neurons.** For all neurons, we calculated the  
665 difference in normalized firing rate between the first and last acoustic pulse for a given stimulus. (a.) For Sync-  
666 neurons, this difference was significant for all repetition rates (Wilcoxon signed rank test,  $P \ll 0.001$ ) with the  
667 exception of 8Hz (Wilcoxon signed rank test,  $P = 0.10$ ). For Sync+ neurons, this difference was significant for  
668 repetition rates equal or larger than 16Hz, with the exception of 40Hz (8Hz;  $P = 0.71$ . 12Hz;  $P = 0.06$ . 16Hz;  $P =$   
669  $0.007$ . 20Hz;  $P = 0.04$ . 24Hz;  $P = 0.009$ . 28Hz;  $P = 0.006$ . 32Hz;  $P = 0.002$ . 36Hz;  $P = 0.01$ . 40Hz;  $P = 0.07$ .  
670 44Hz;  $P = 0.03$ . 48Hz;  $P = 0.04$ ). (b.) We then compared this difference between Sync+ and Sync- neuron  
671 populations ( $n = 26$  and  $n = 27$  respectively). This difference was significant for repetition rates above 20 Hz.  
672 (Wilcoxon rank-sum test. 8Hz;  $P = 0.37$ . 12Hz;  $P = 0.61$ . 16Hz;  $P = 0.12$ . For higher repetition rates  $P \ll 0.01$ )

673 **S2 Fig. Sync+ (a.) and Sync- (b.) neuron responses to stimulus pulse trains.** For all neurons, the average  
674 number of spikes were extracted at each acoustic pulse for all repetition rates. The responses were then normalized  
675 by average discharge rate of the neuron during stimulus presentation. Real data (grey), linear fit (red) first degree  
676 exponential fit (blue).

677 **S3 Fig. Fitted model coefficients to adaptation during stimulus presentation.** (a, b) linear model coefficients  
678 with 95% confidence intervals. Stronger negative values of  $p_1$  indicate stronger depression during stimulus  
679 presentation. (c.) R-squared fit of data to linear model. (c, d) exponential model coefficients with 95% confidence  
680 intervals. Stronger negative values of  $b$  indicate a steeper curve to the exponential model, indicating a fast  
681 adaptation followed by a flat response. Positive values of  $b$  indicate no adaptation or facilitation.

682 **S4 Fig. Onset response amplitude relative to strength of adaptation.** Average onset response at time constants  
683  $\{\tau_{pE} = 0.15, \tau_{pI} = 0.10\}$  for different values of  $A_{DE}$  and  $A_{DI}$ . Onset response amplitude did not vary with strength  
684 of adaptation.

685 **S5 Fig. Comparison of ISI after stimulus onset.** ISIs between the first four spikes were compared to determine  
686 the presence of SRA for Sync+ (a,b) and Sync- (c,d) real neuron populations for all individual trials across all  
687 neurons ( $n = 260$  and  $n = 270$  respectively). All four distributions had a non-zero median (KS test,  $P < 0.05$ ). For  
688 Sync+ neurons, the median difference between first and second ISI was 0.59s (a.) and was 1.21ms for the median  
689 difference between first and third ISI (b.). For Sync- neurons, the median difference between first and second ISI  
690 was 0.33s (c.) and was 0.24ms for the median difference between first and third ISI (d.).

691 **S6 Fig. Monotonicity and adaptation in individual neurons.** (a.) correlation between adaptation and firing rate.  
692 Distribution of strength of adaptation near onset (b.) and at the middle of stimuli duration (c.) Sync- neurons  
693 showed significant depression between the first and second (median = 0.73, t-test,  $P \ll 0.001$ ) and between first  
694 and third pulse (median = 0.90,  $P \ll 0.001$ ) (b.), but not between 2nd and 5th pulse nor between 5th and 8th pulse  
695 (median = -0.12,  $P = 0.33$  and median = 0.07,  $P = 0.51$  respectively.) (c.). Sync + neurons showed no significant  
696 depression between 1st and 2nd pulses and between 1st and 3rd pulses respectively (median = 0 for both, t-test,  $P$   
697 = 0.12 and  $P = 0.25$  respectively) nor at the later stages of stimuli presentation between 2nd and 5th pulse (median  
698 = -0.33, p value = 0.31), and between 5th and 8th pulse, (median = 0.07 p value = 0.54).

699 **S7 Fig. Puretone responses.** (a.) Average firing rate for simulated Sync+ and Sync- responses to puretones. (b.)  
700 Average firing rate for real Sync + ( $n = 26$ ) and Sync- ( $n = 27$ ) neurons to puretones.

701 **S8 Fig. Puretone responses and SFA.** Puretone responses in simulated Sync+ (a.) and Sync- (b.) neurons. SFA  
702 was introduced to our model with values ranging between 10 and 50nS (see methods). Stronger SFA reduced both  
703 onset and sustained responses on Sync+ model neurons but did not affect Sync- neurons. (c.) Average of median  
704 spike times during stimuli presentation for simulated neurons with different values of adaptation amplitude  $A_D$ .

705

706

707

708



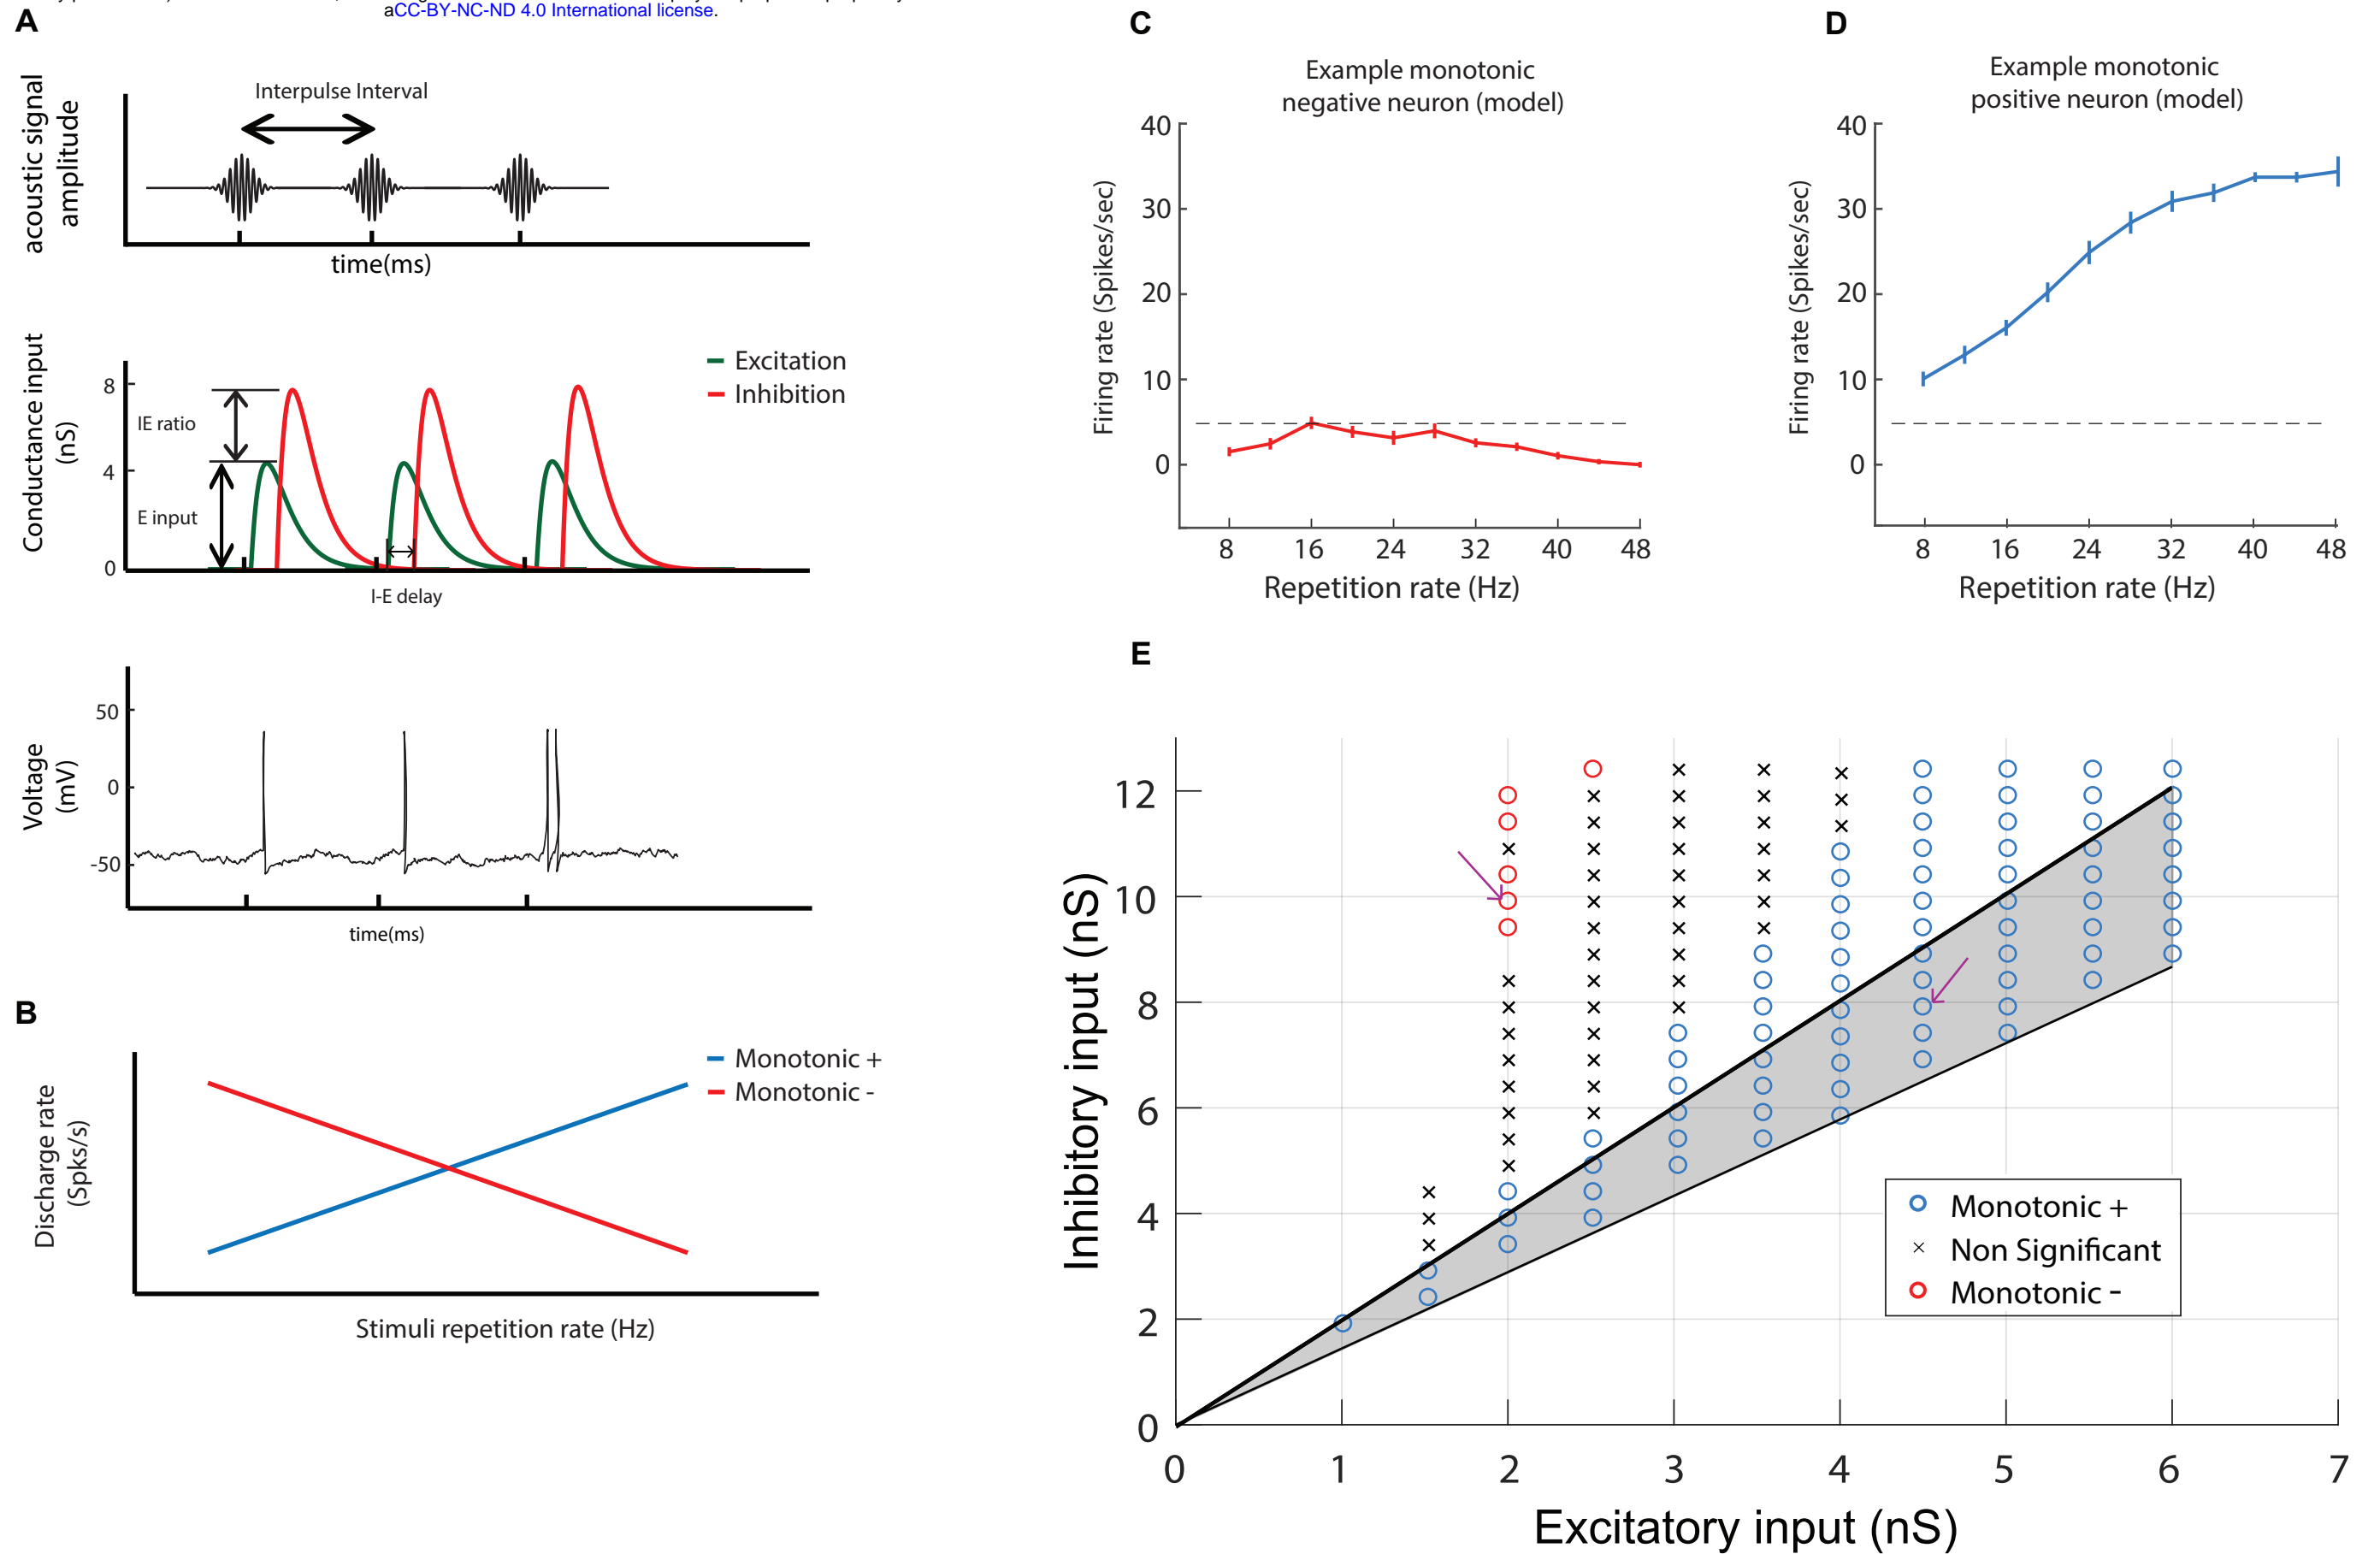

**Figure1.** Computational model of an auditory cortical neuron

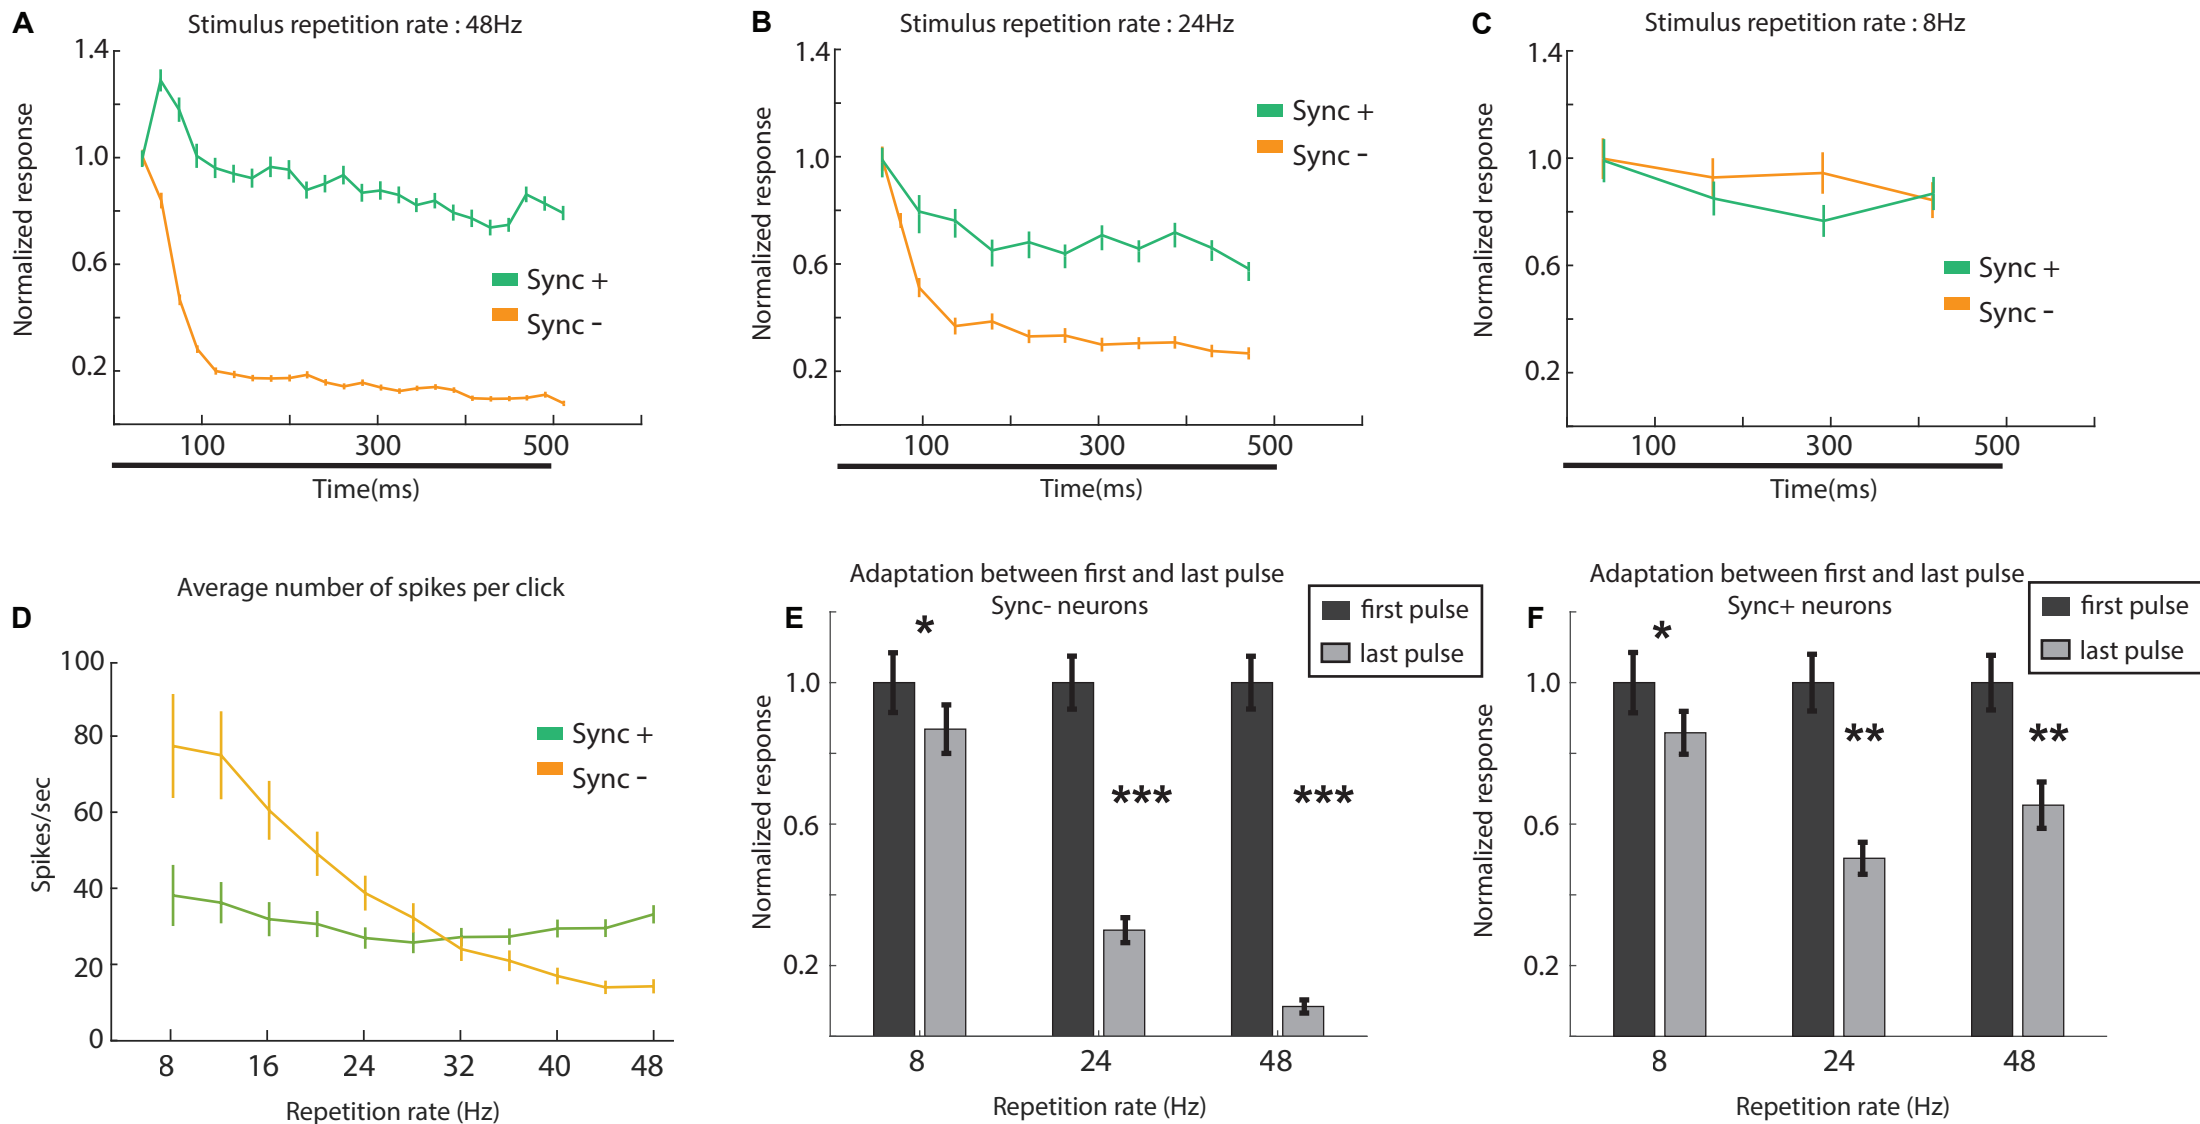

**Figure 2.** Event-related activity of monotonic Sync neurons

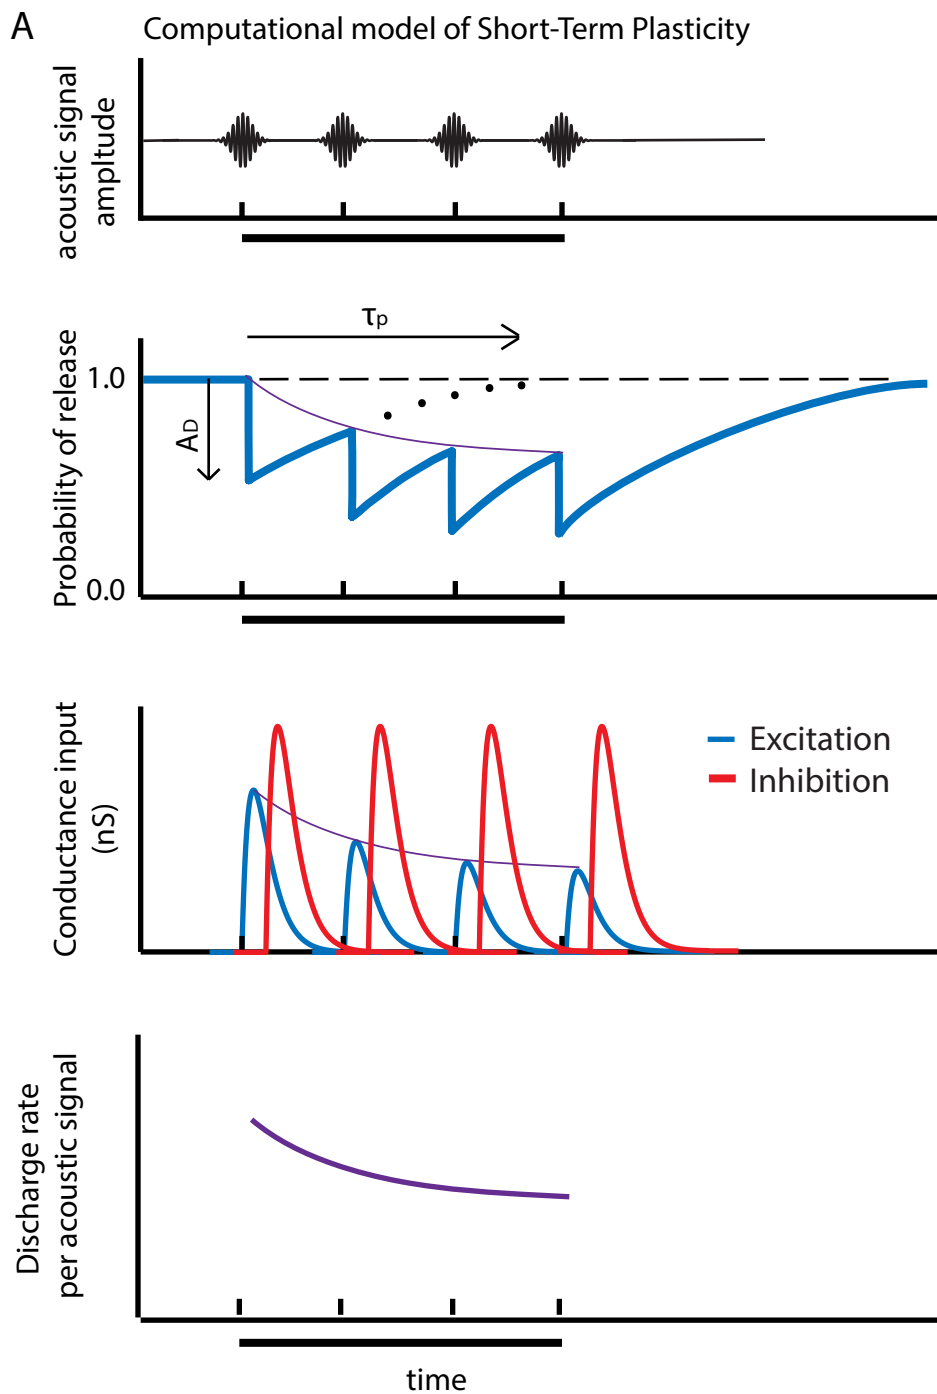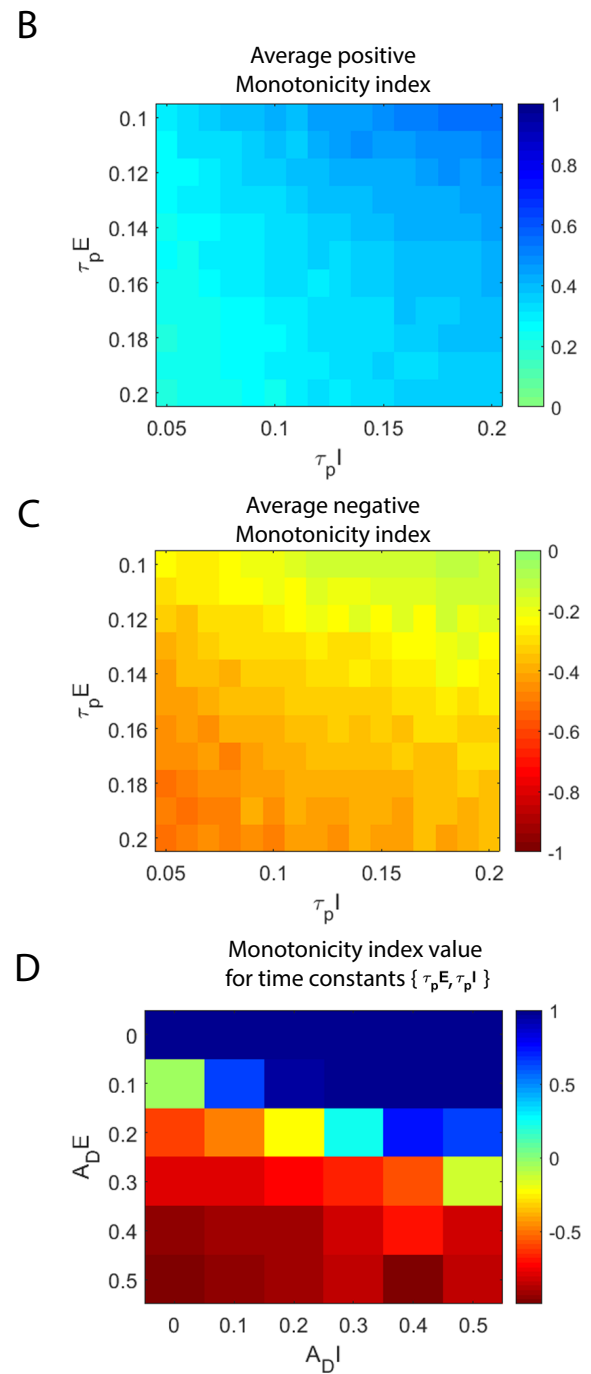

**Figure 3.** Computational model of an auditory cortical neuron with short term depression

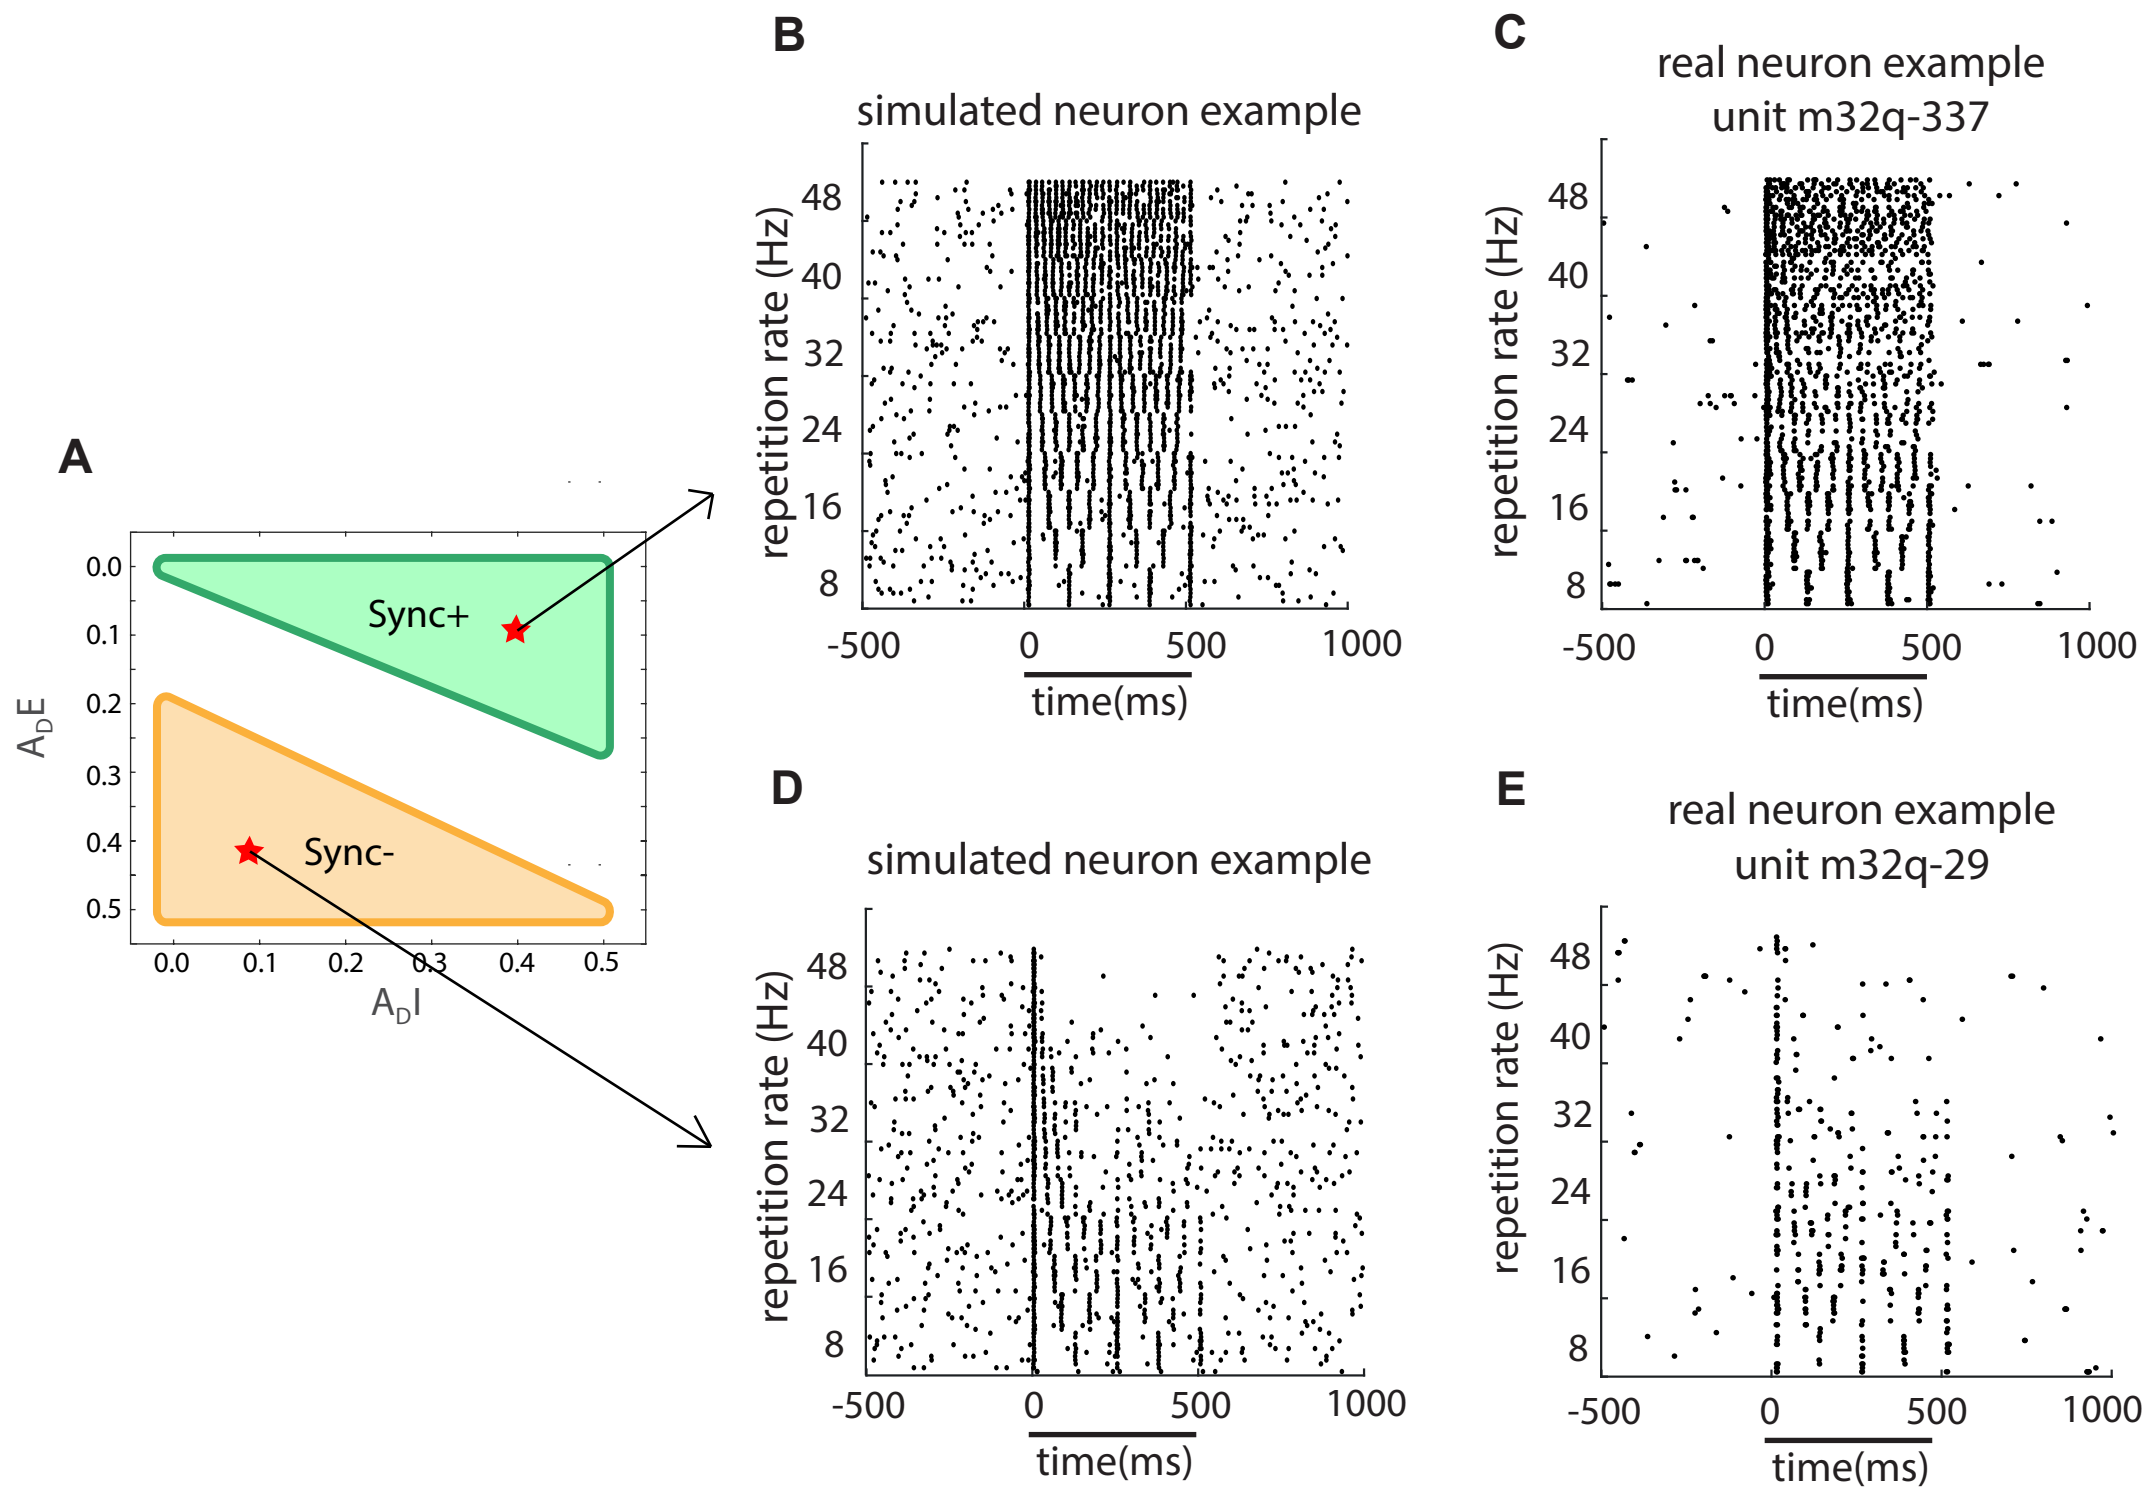

**Figure 4.** Real and Simulated monotonic Sync example neurons

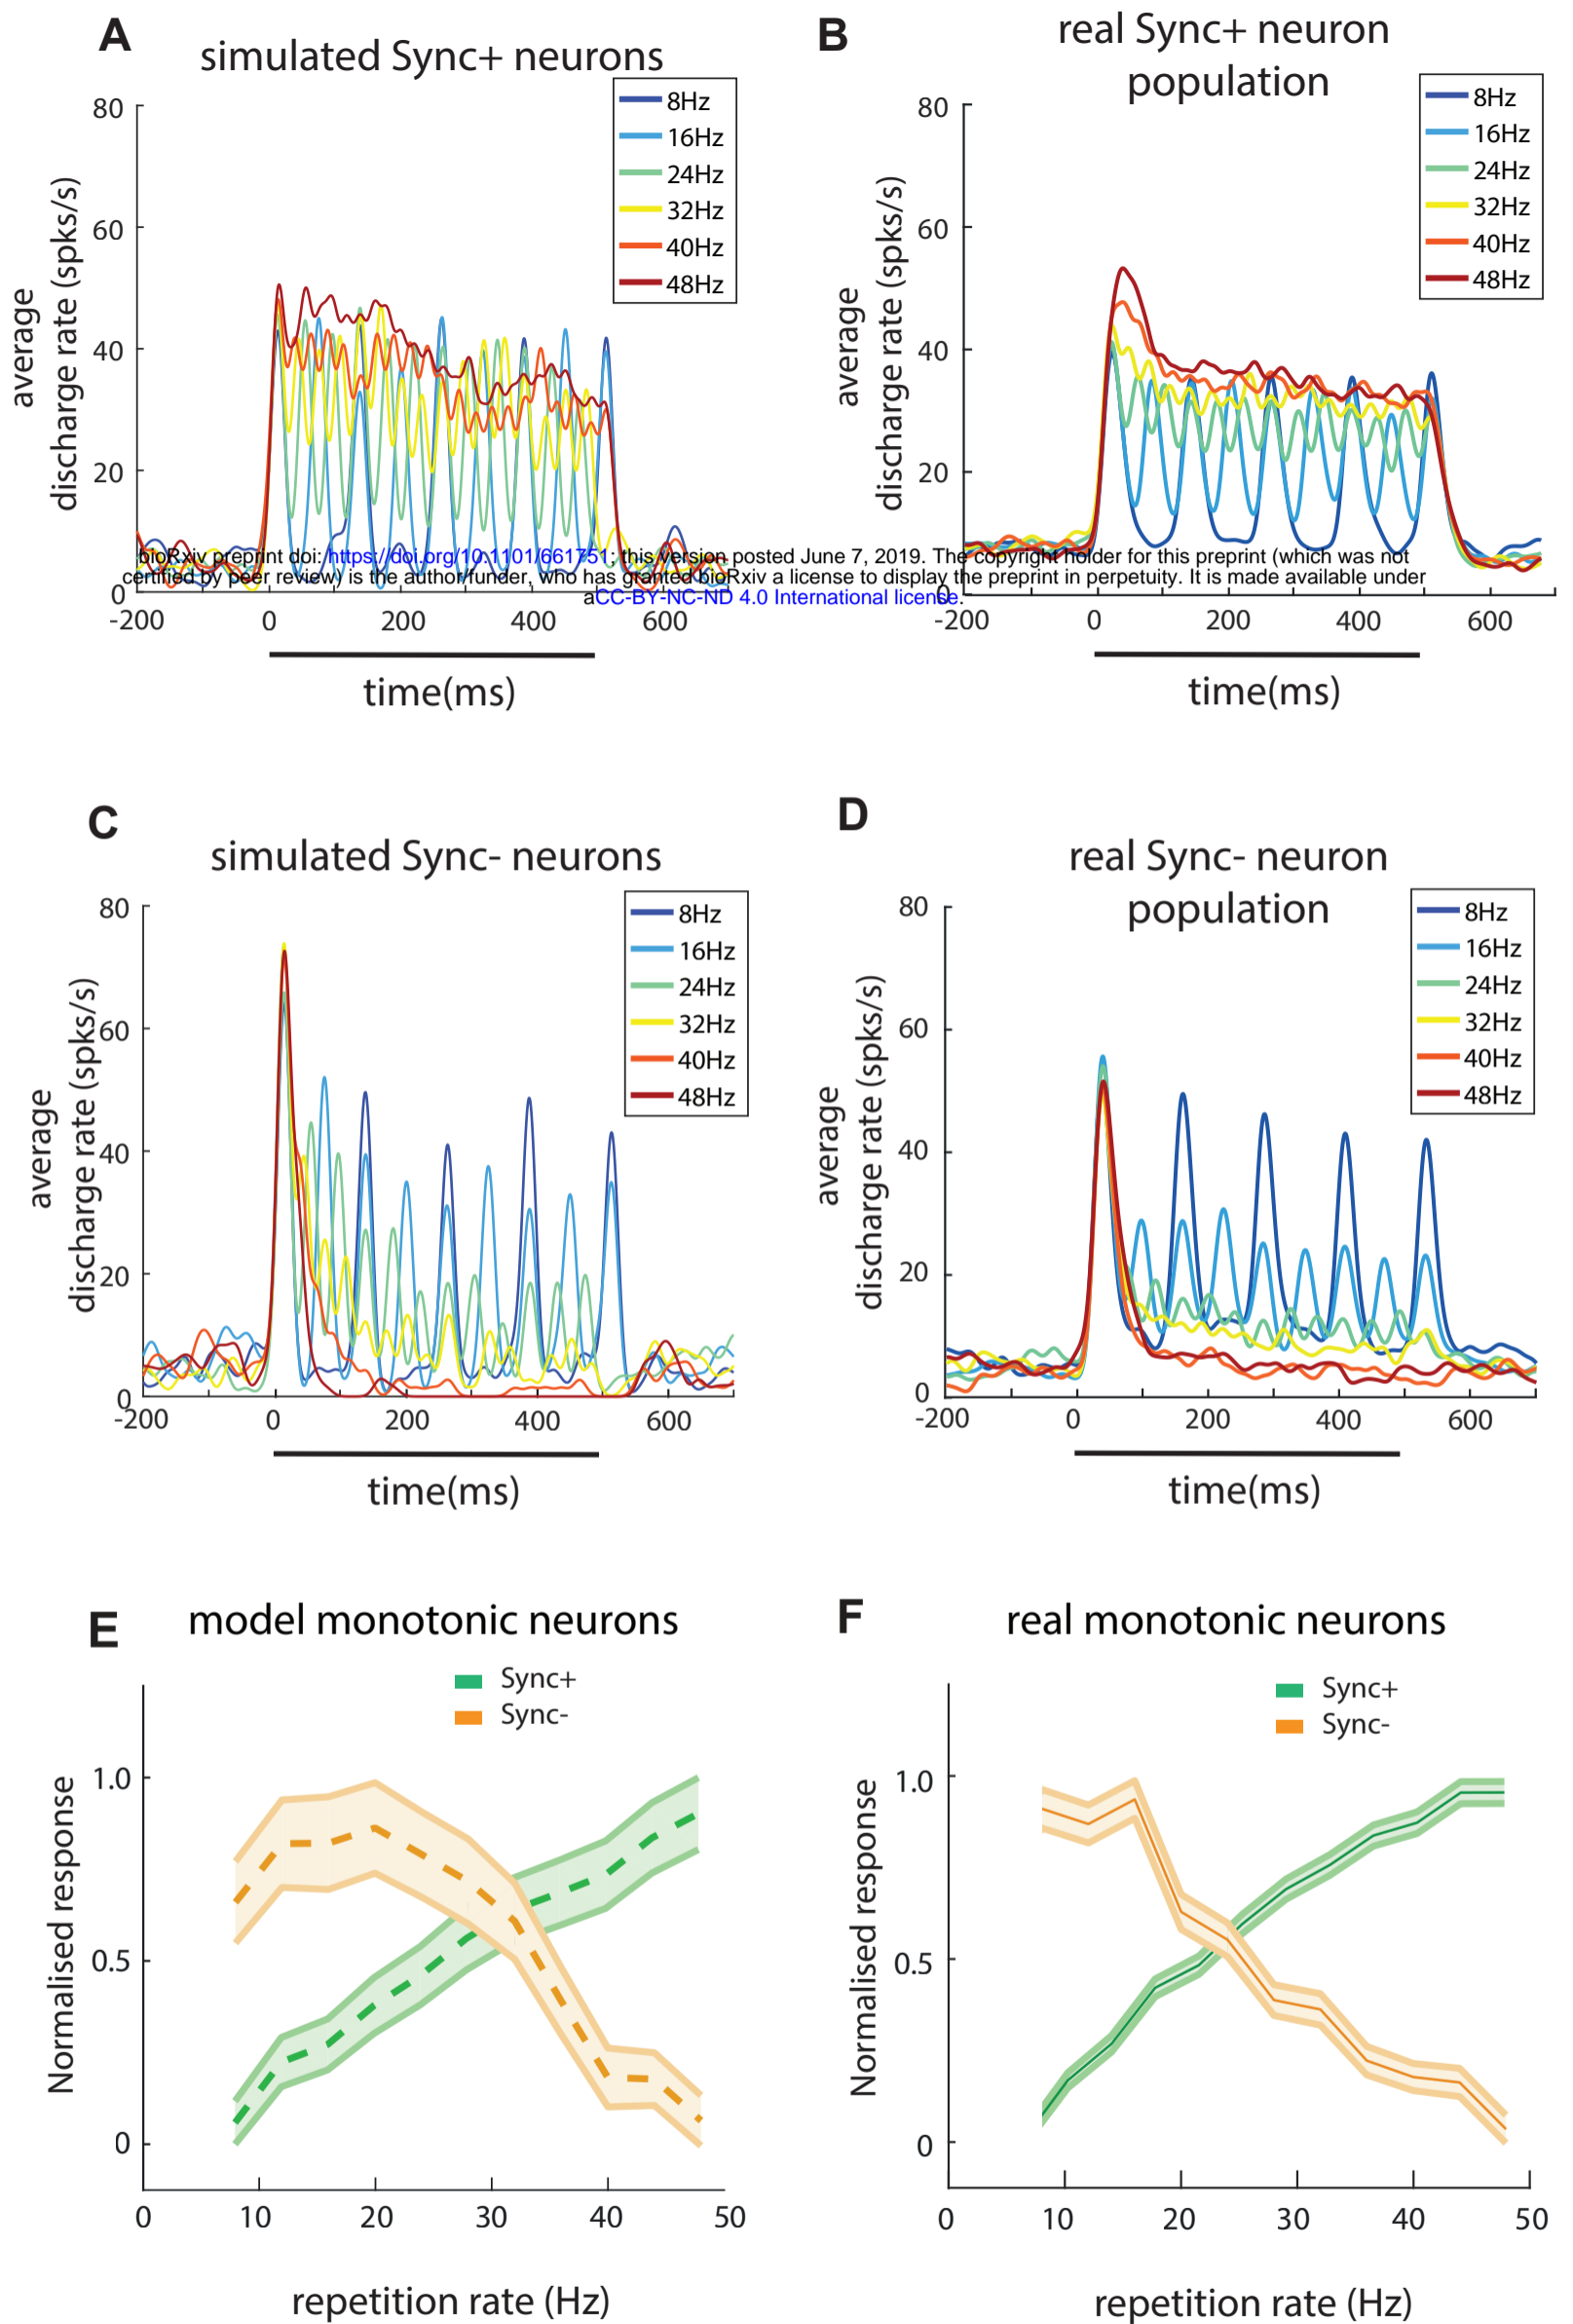

**Figure 5. Monotonicity of real and simulated neurons**

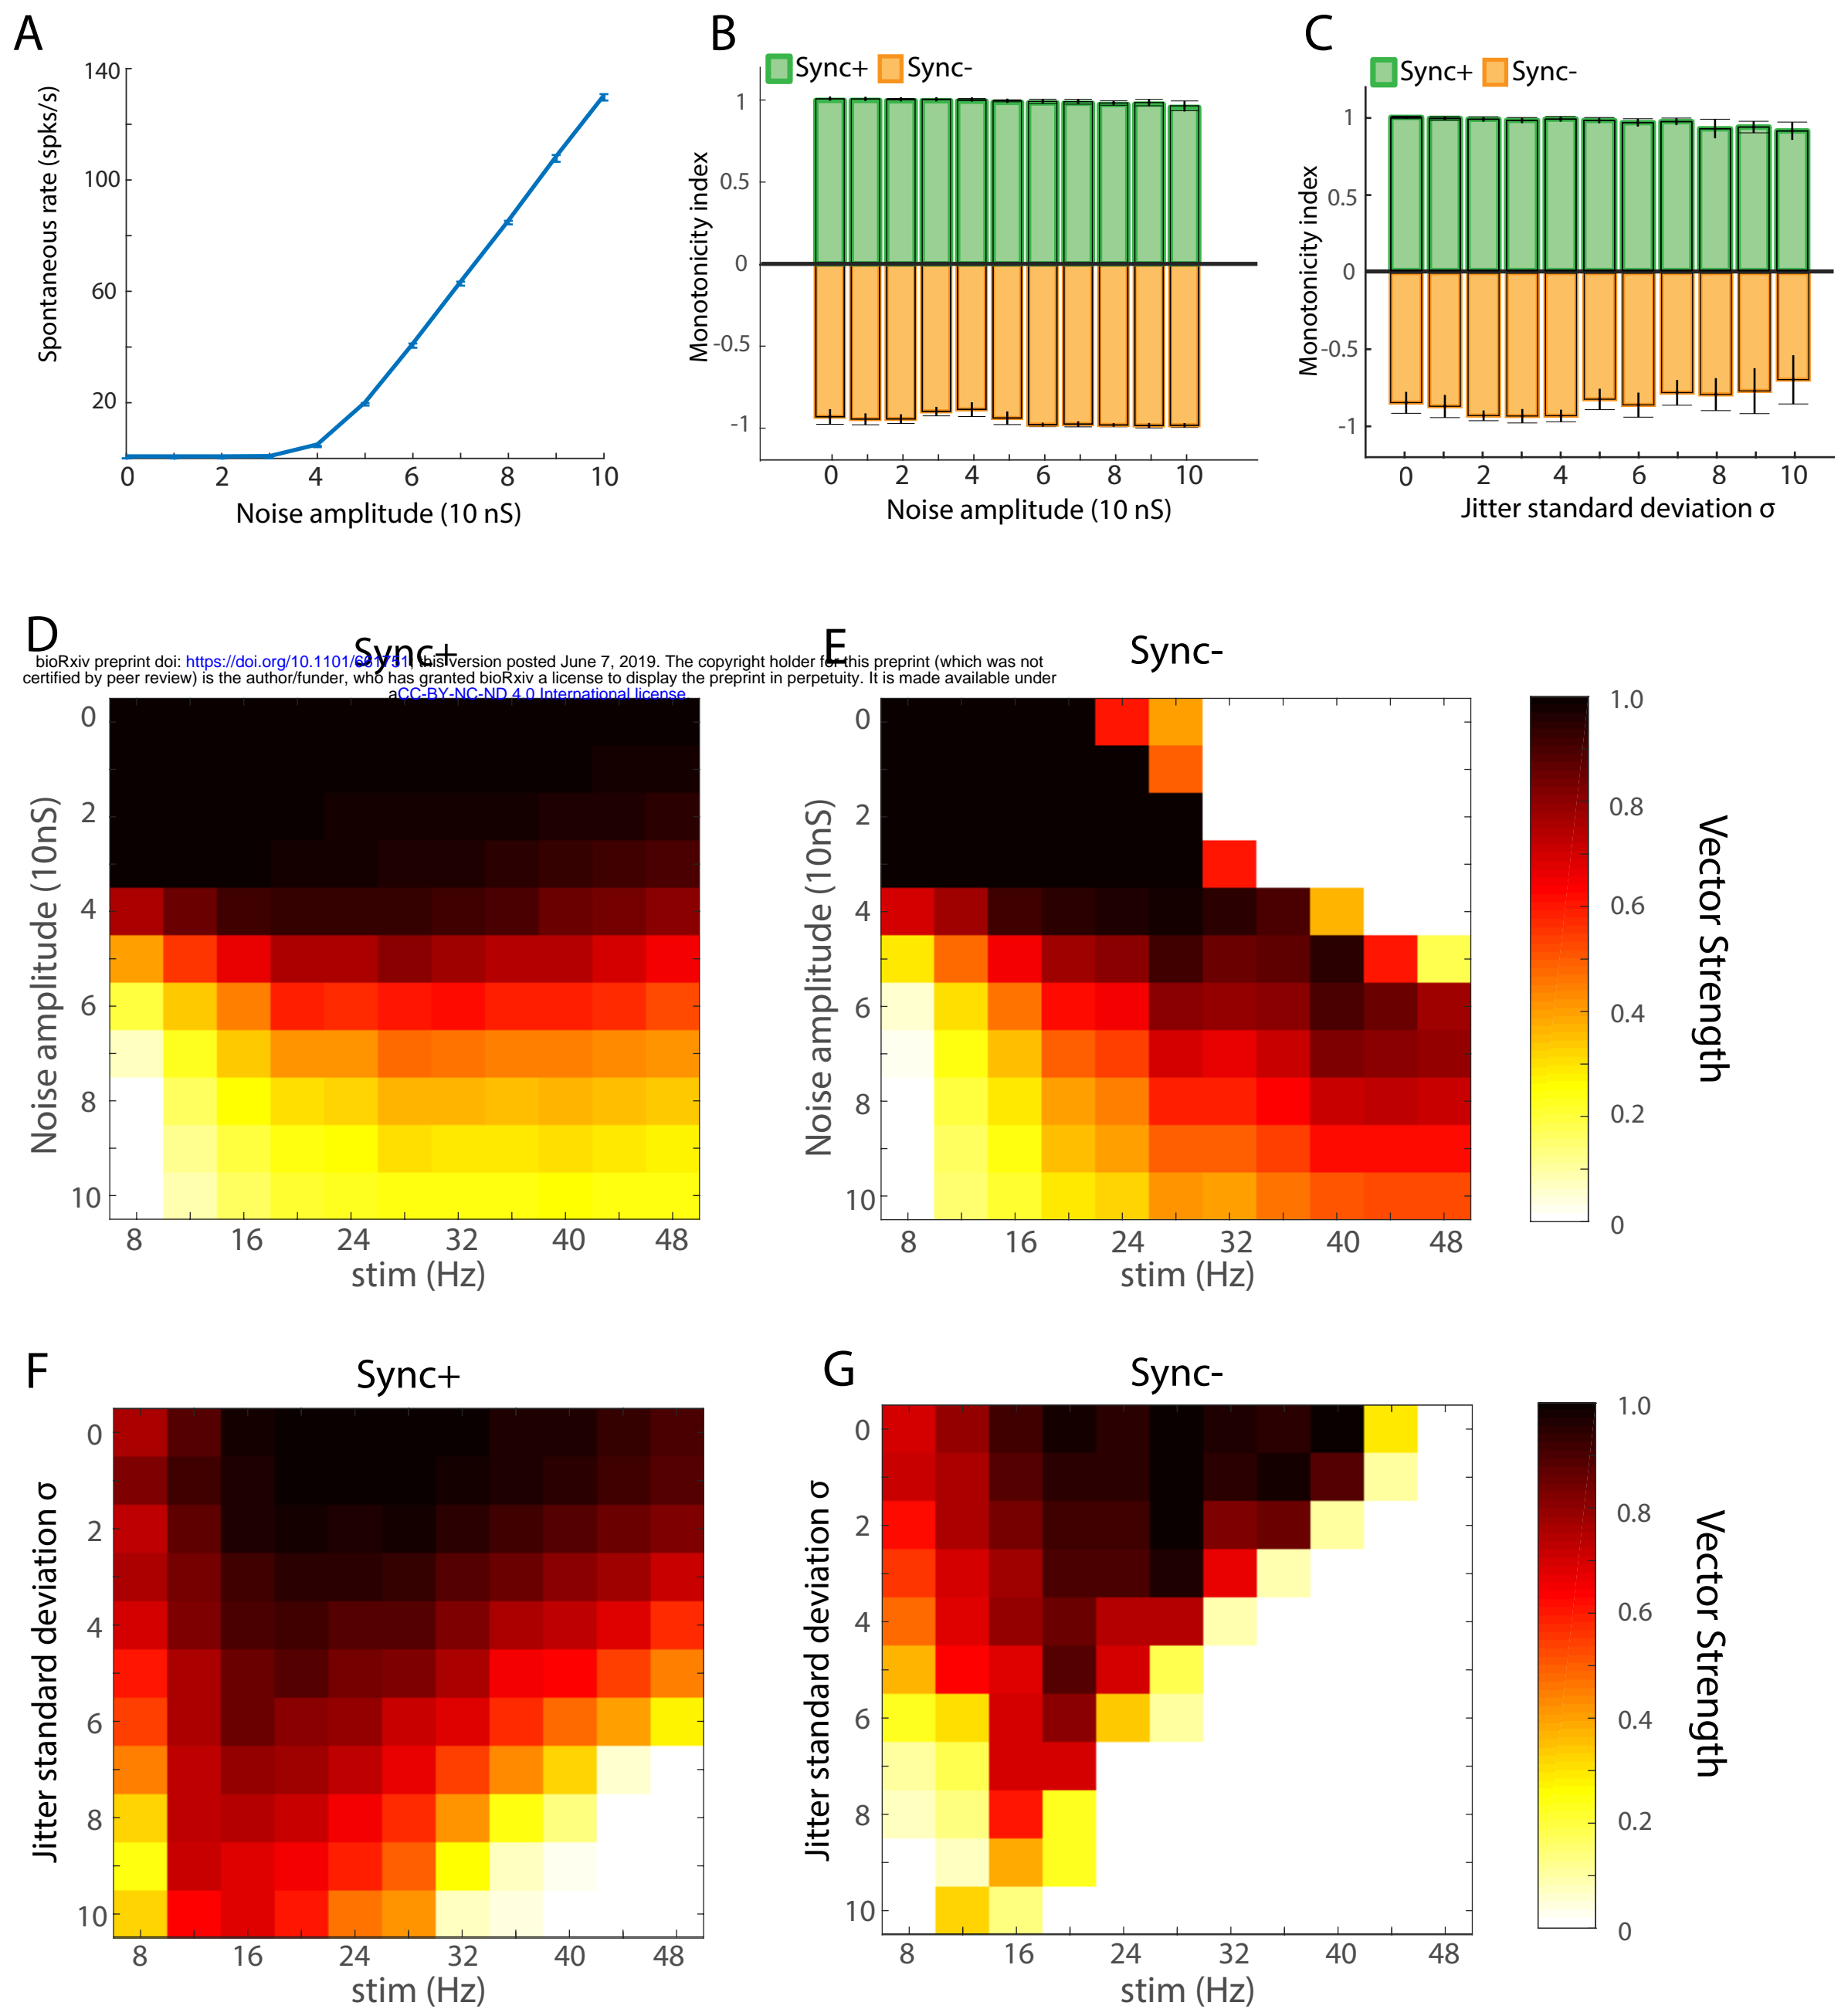

**Figure 6. Model robustness**

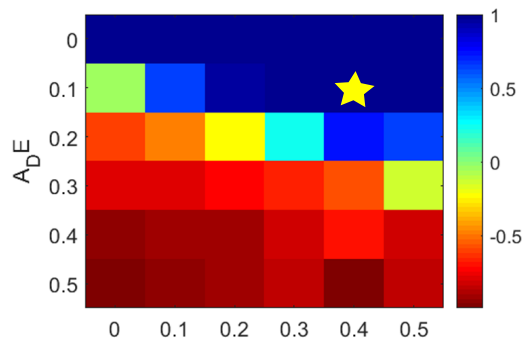

bioRxiv preprint doi: <https://doi.org/10.1101/661751>; this version posted June 7, 2019. The copyright holder for this preprint (which was not certified by peer review) is the author/funder, who has granted bioRxiv a license to display the preprint in perpetuity. It is made available under aCC-BY-NC-ND 4.0 International license.

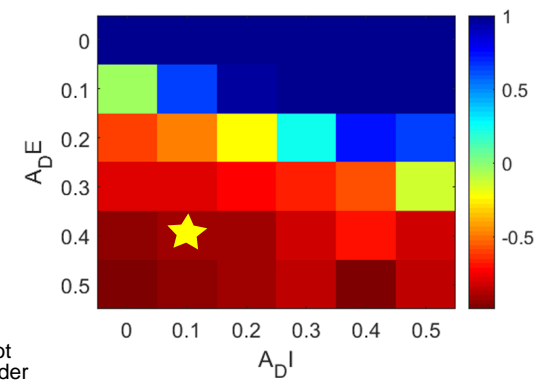

A

$$A_D^E = 0.1, A_D^I = 0.4$$

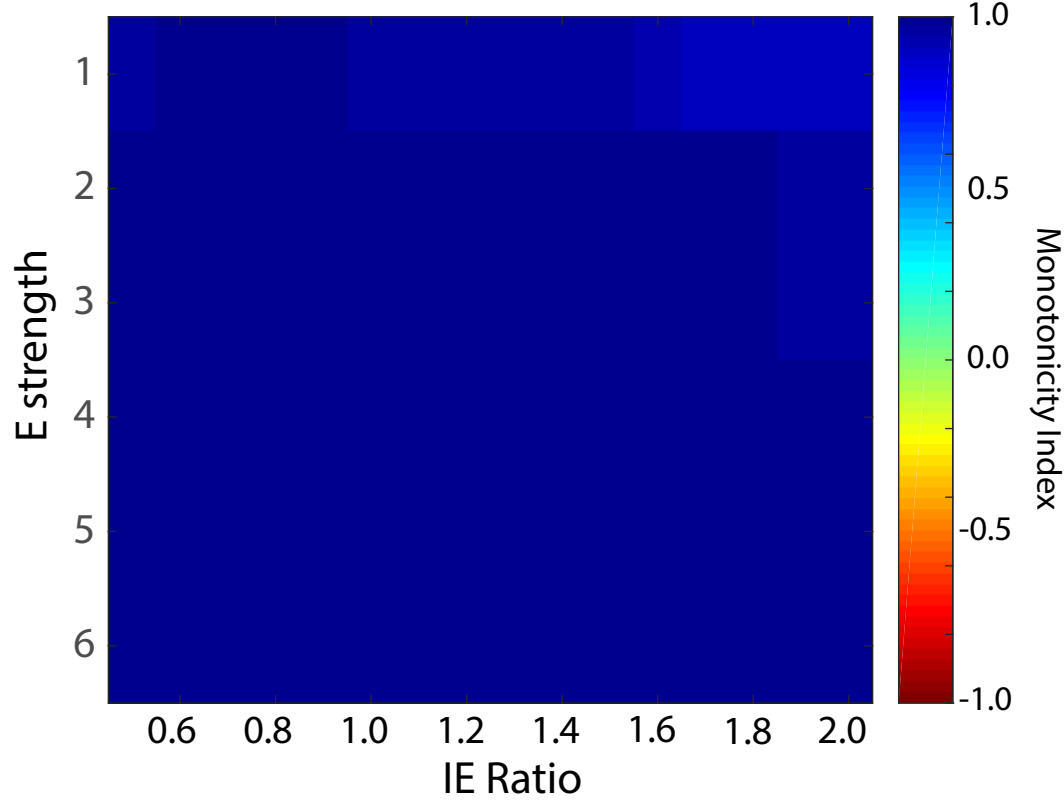

B

$$A_D^E = 0.4, A_D^I = 0.1$$

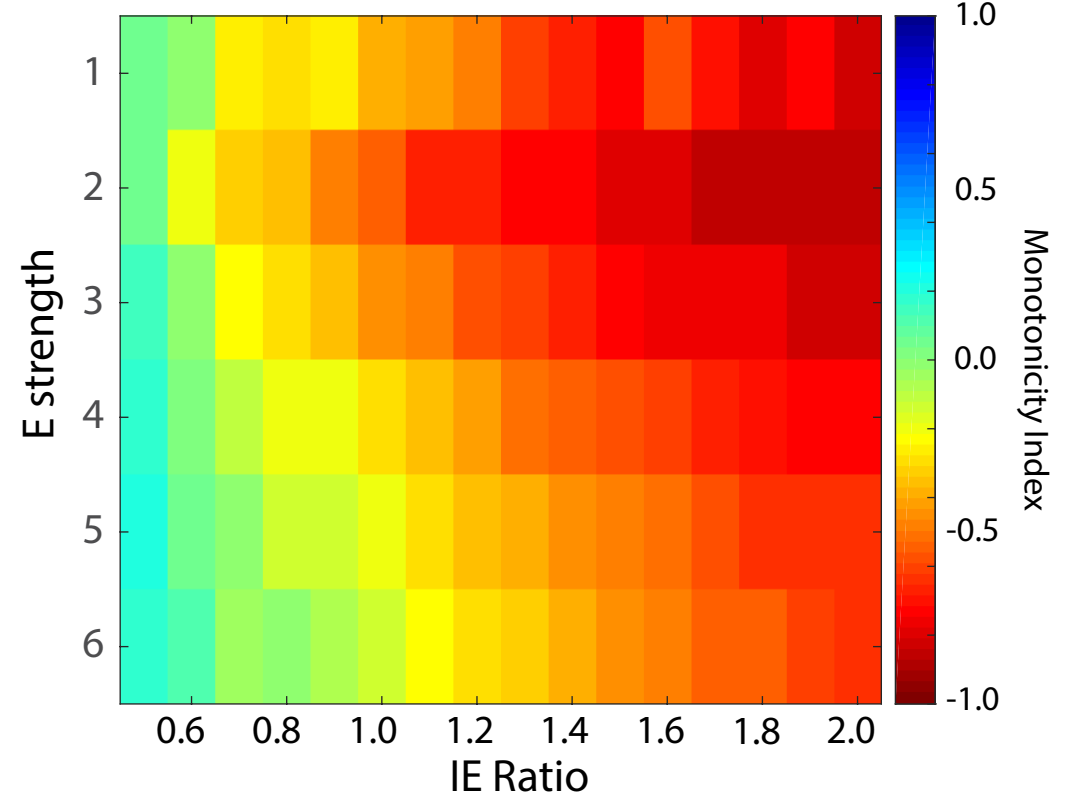

C

$$A_D^E = 0.1, A_D^I = 0.4$$

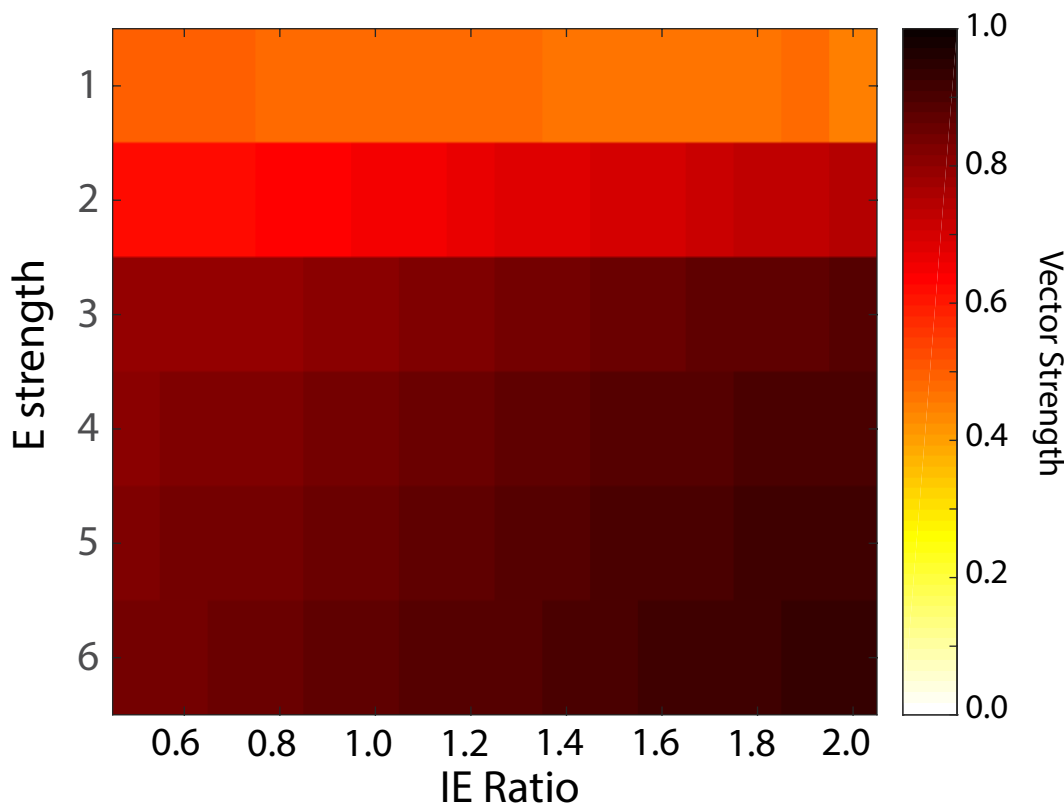

D

$$A_D^E = 0.4, A_D^I = 0.1$$

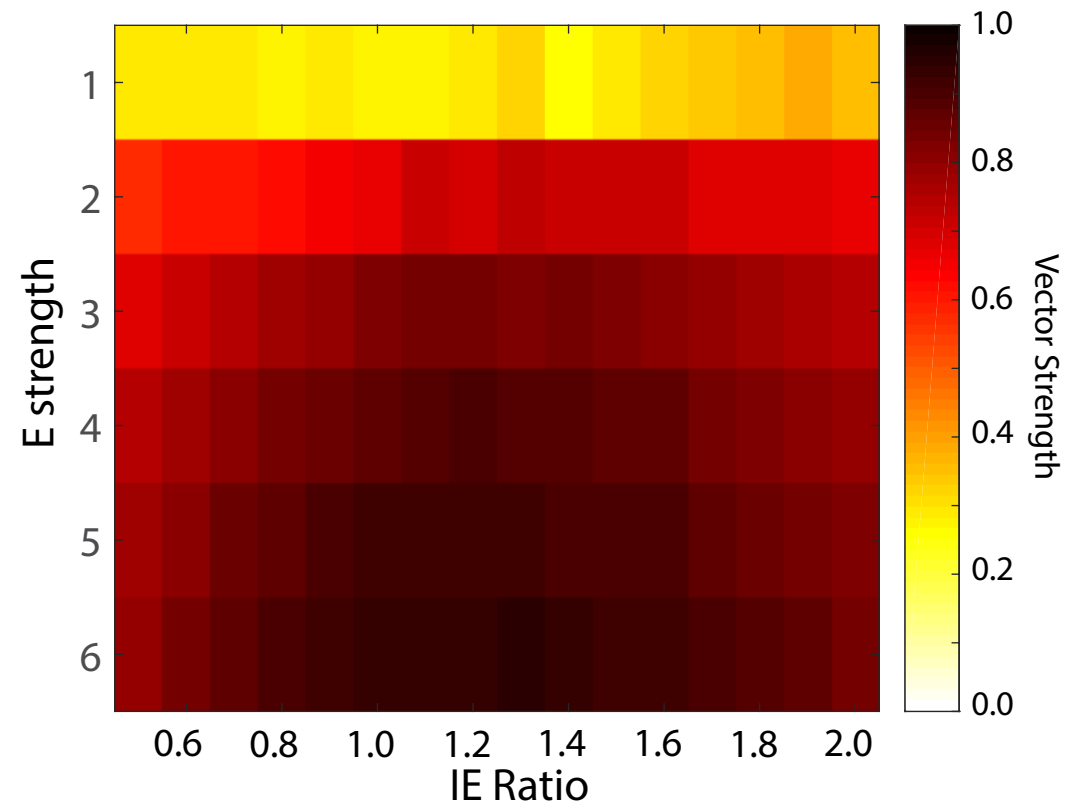

**Figure 7.** Model robustness regarding Excitation and Inhibition amplitude

A

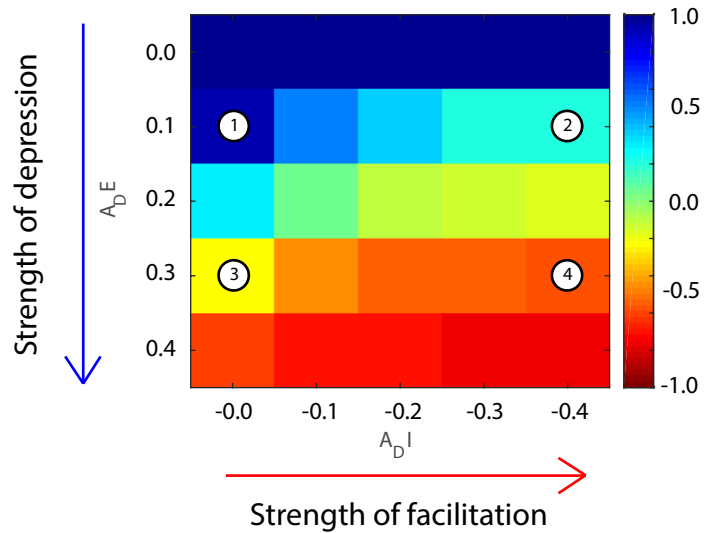

B

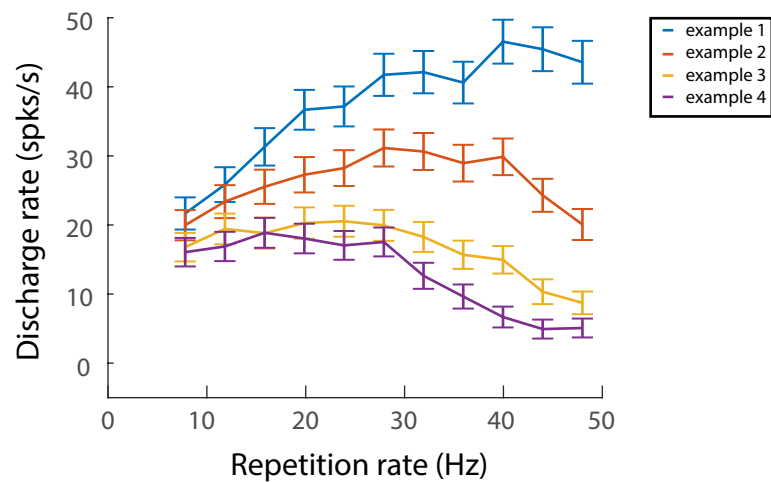

C

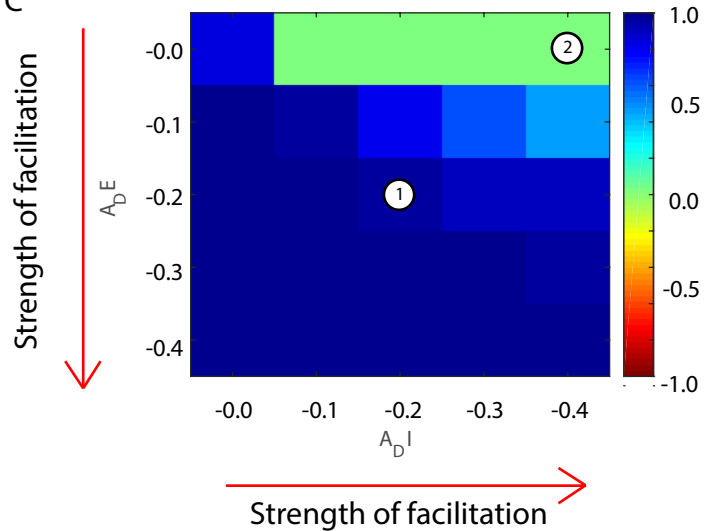

D

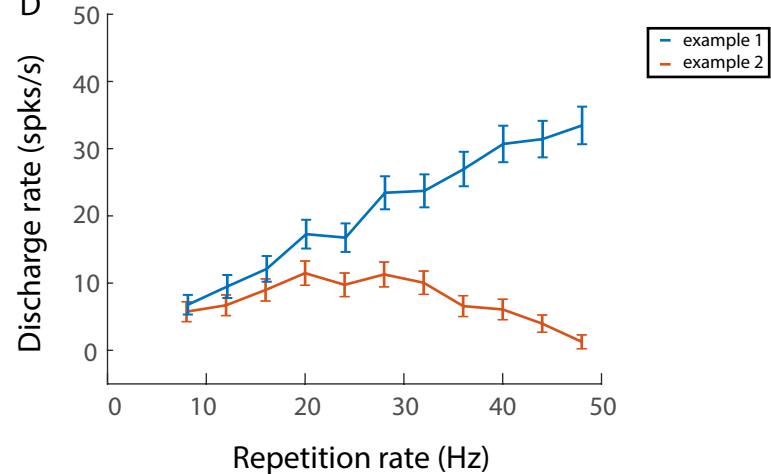

**Figure 8.** Computational model including short term facilitation



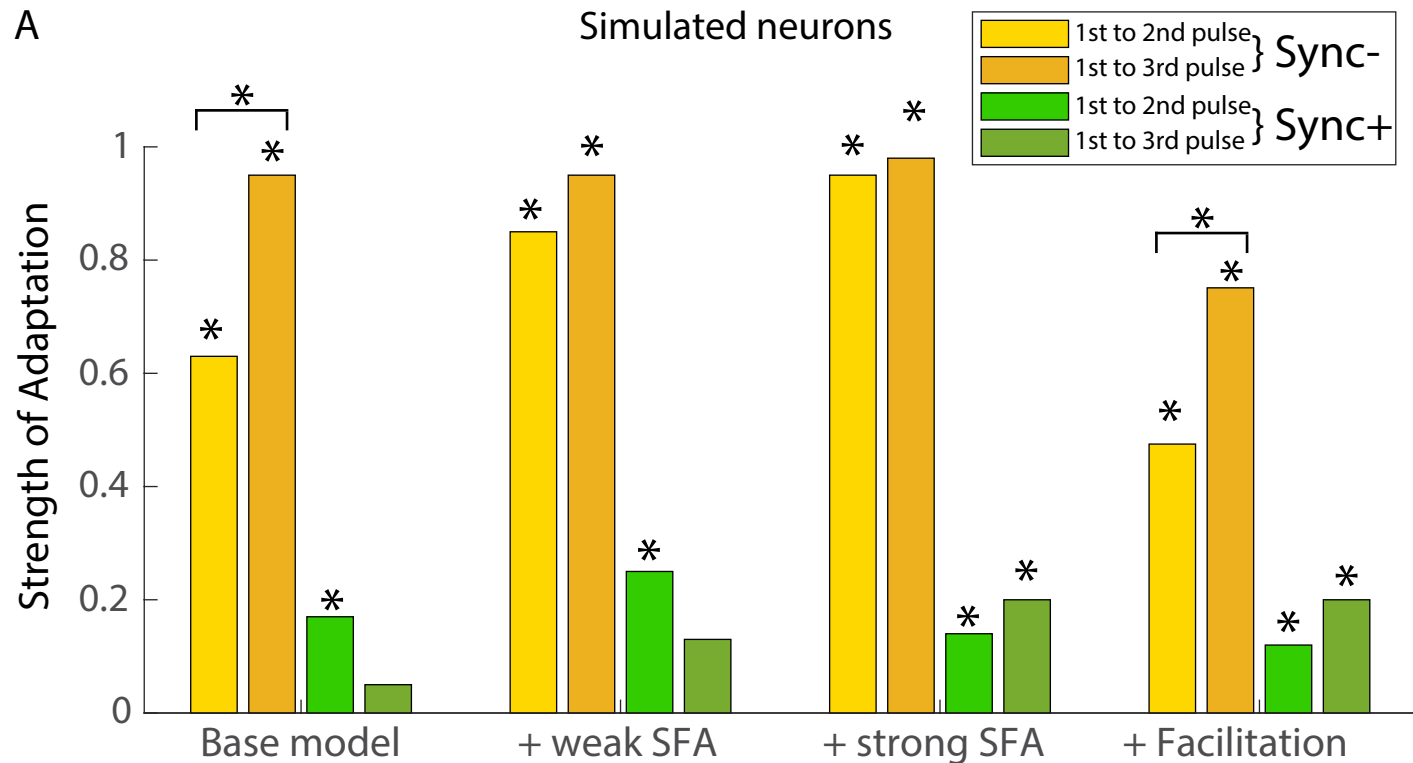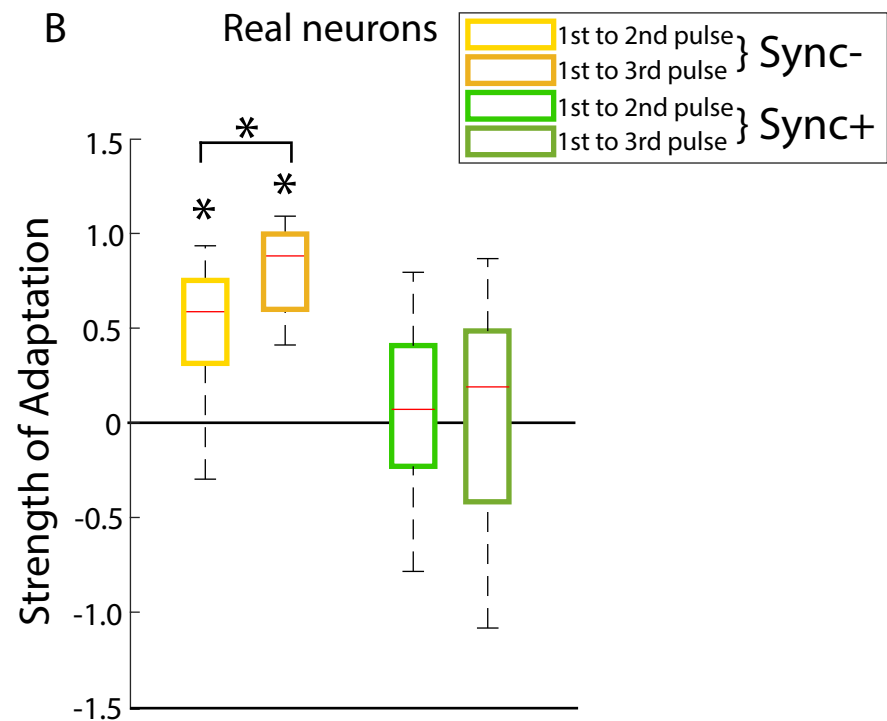

**Figure 9.** Adaptation between individual synaptic inputs for real neurons and different models

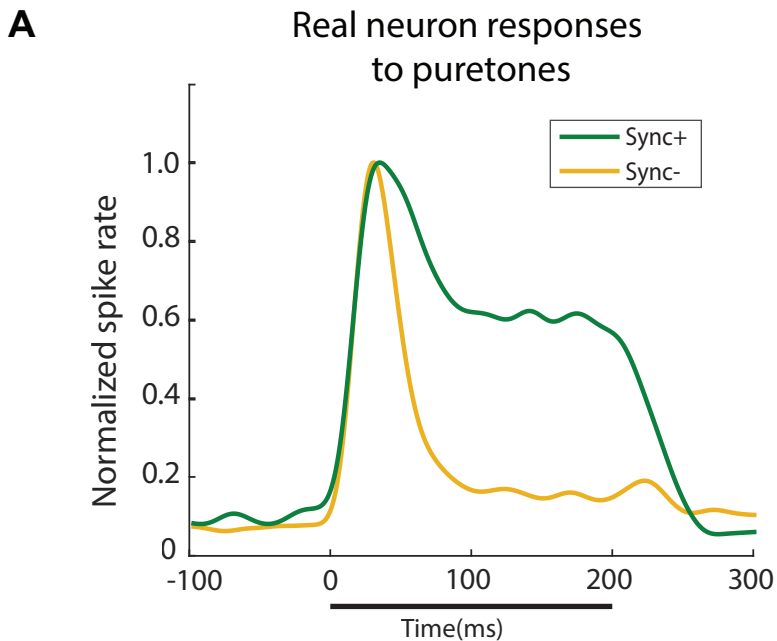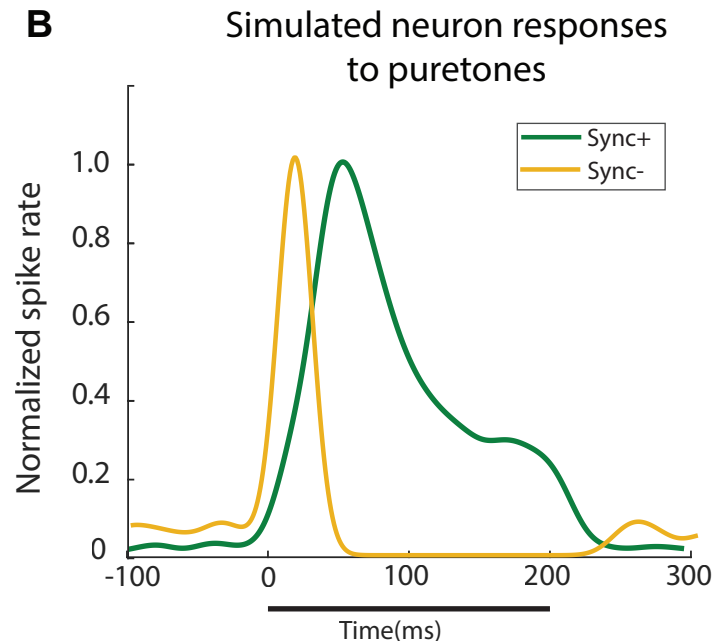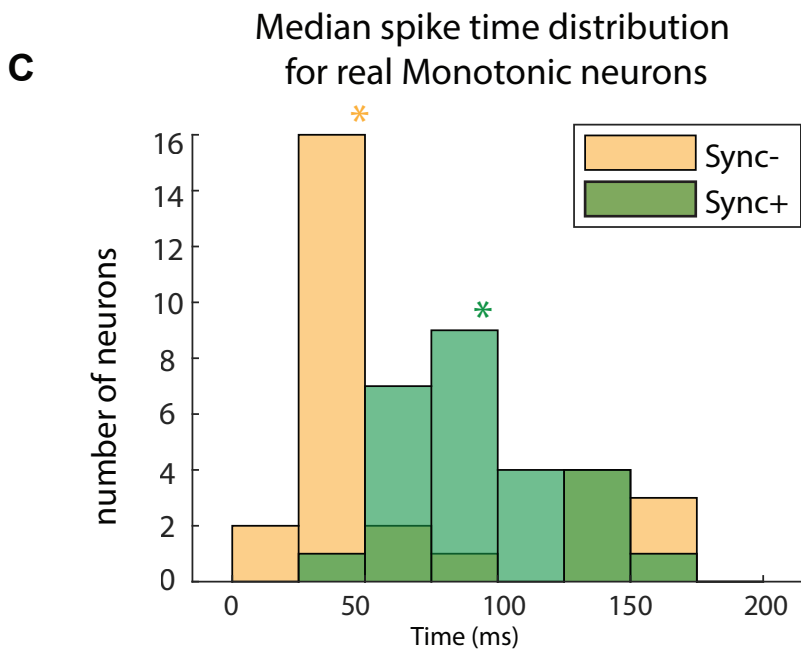

**Figure 10.** Pure tone responses

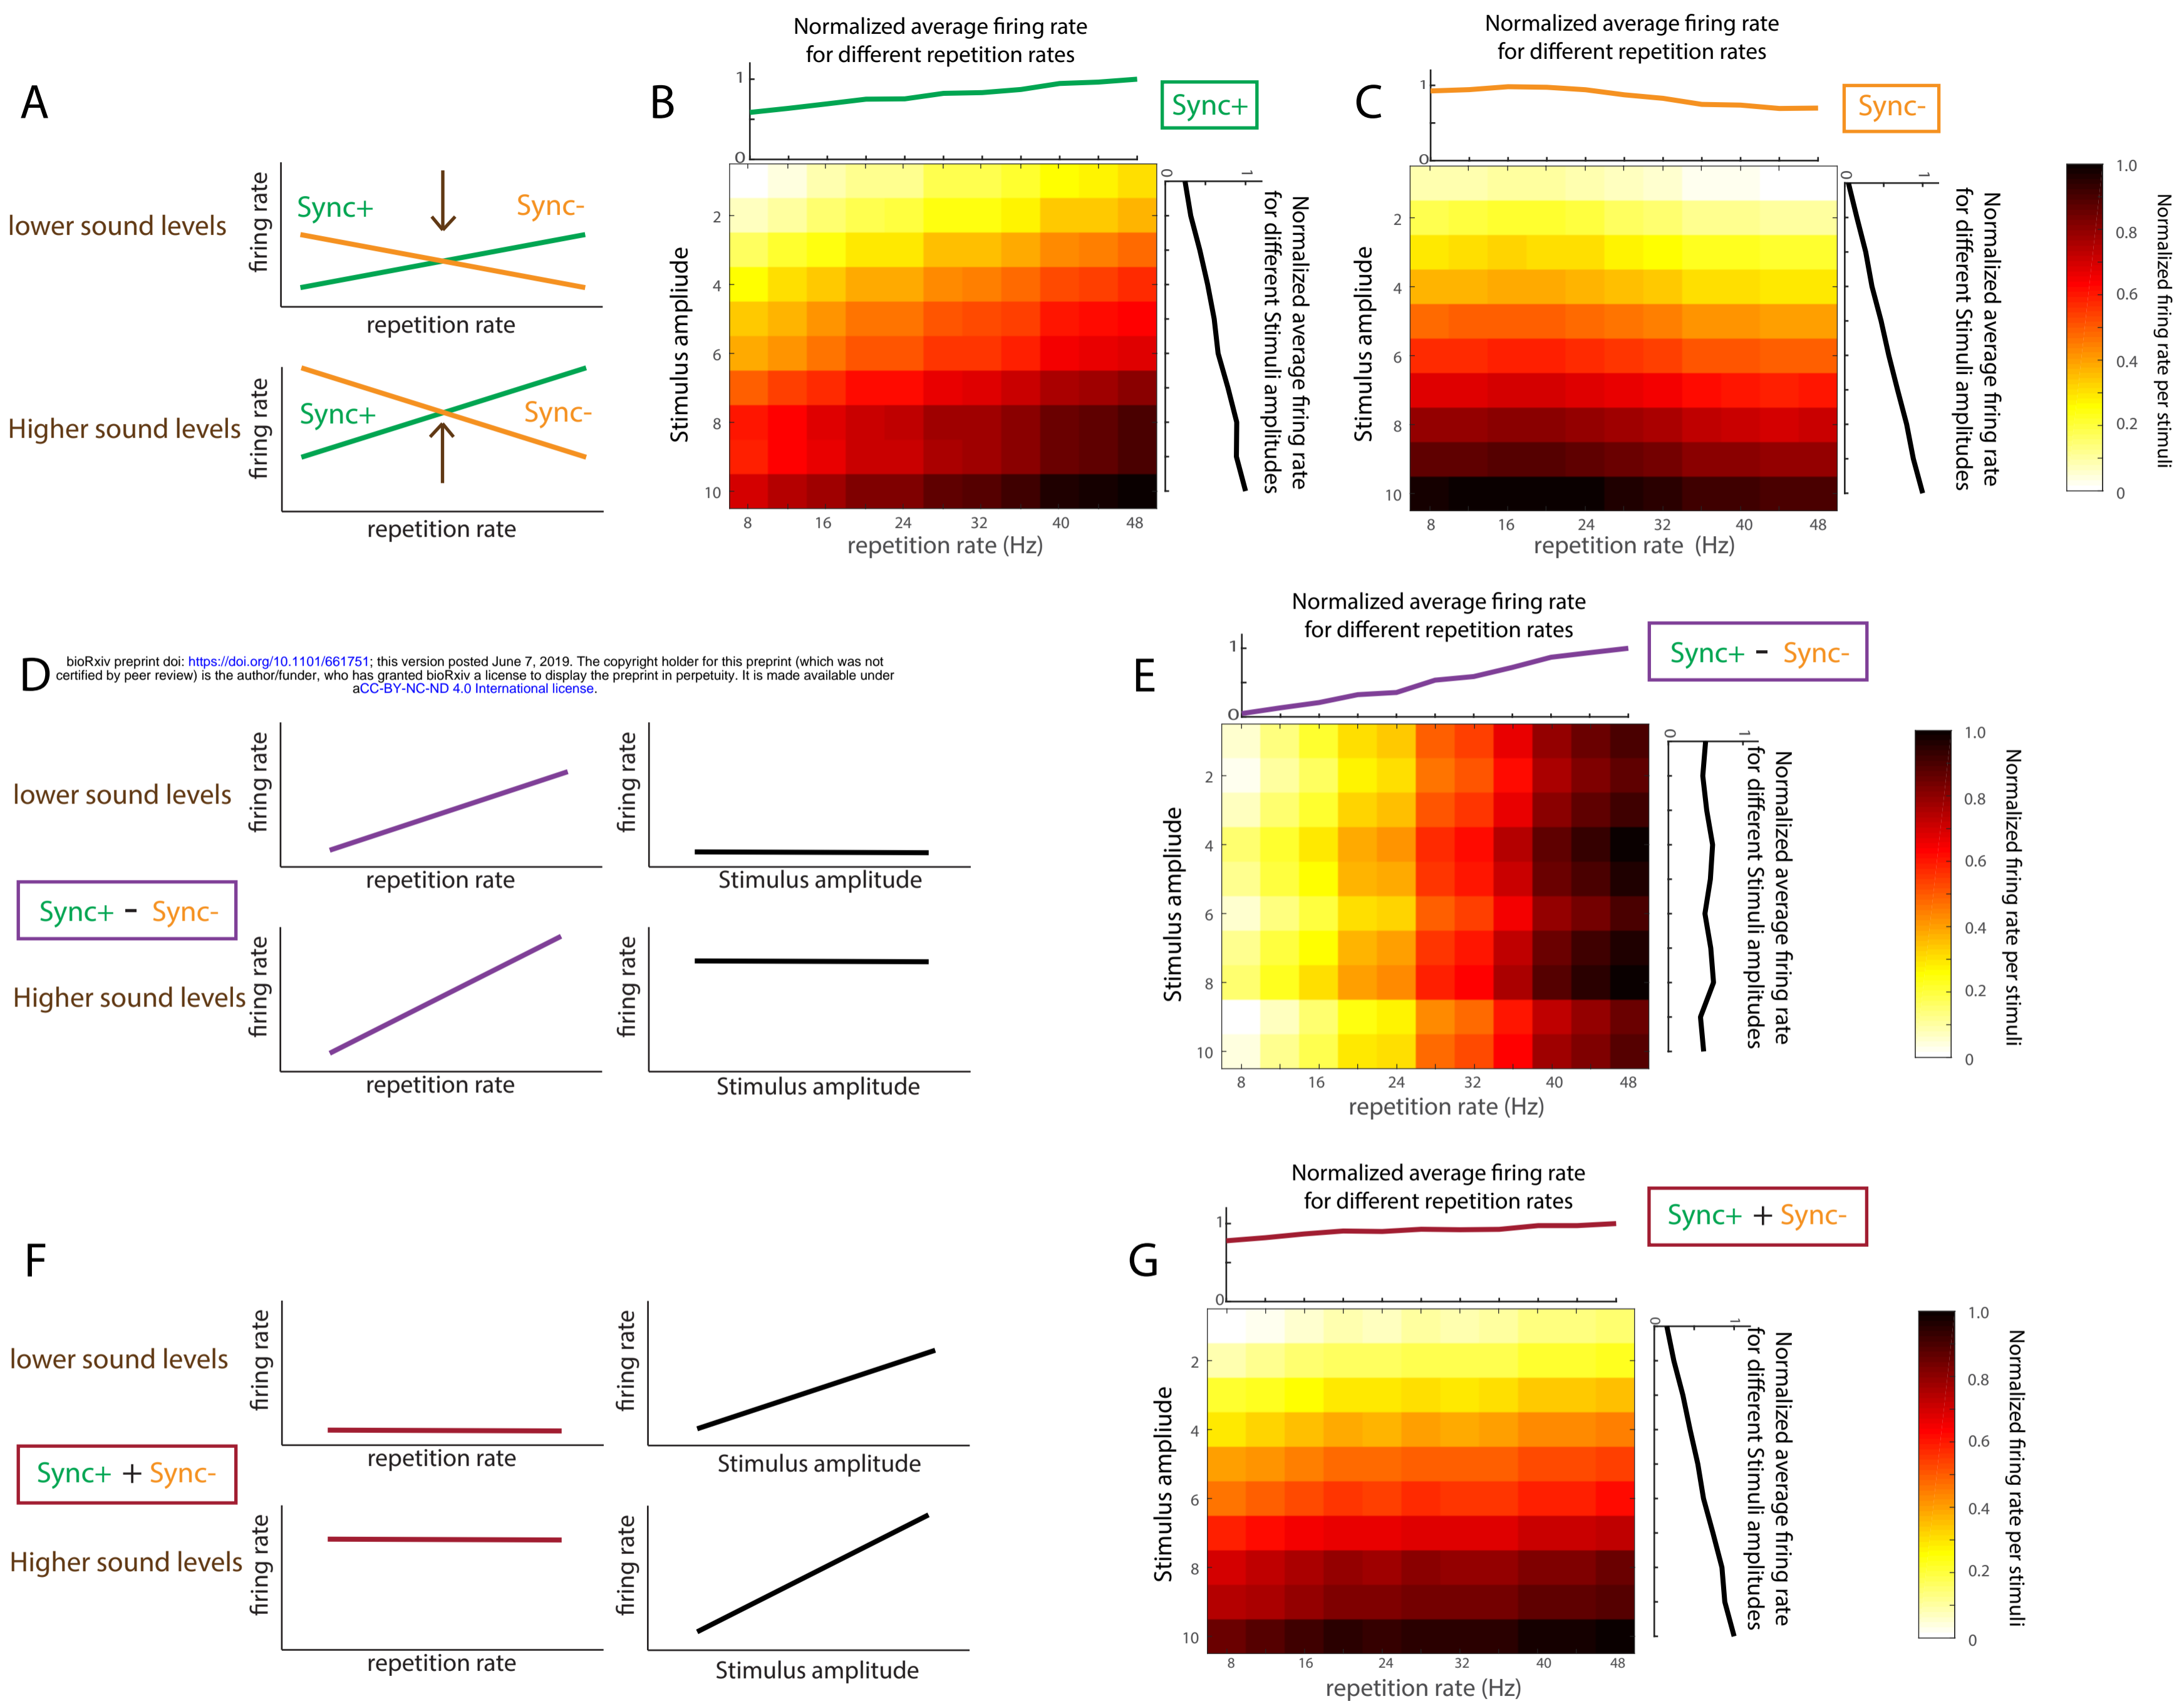

**Figure 11.** Opponent coding with Sync+ and Sync- neurons.

**A** Mutual information between Firing rate and stimulus repetition rate

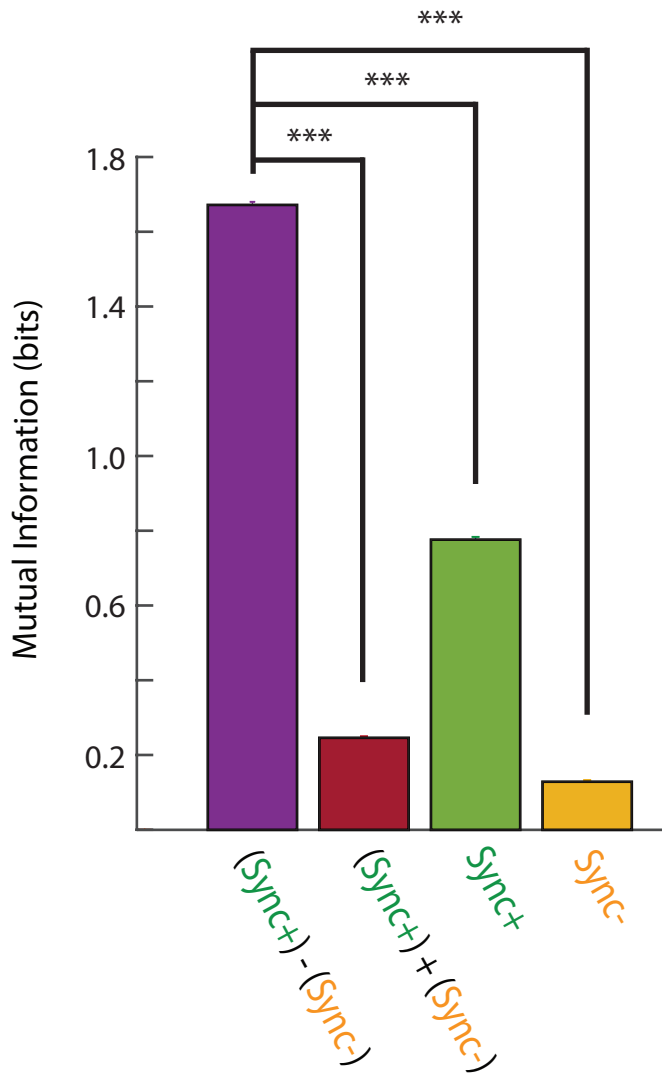

**B** Mutual information between Firing rate and stimulus amplitude

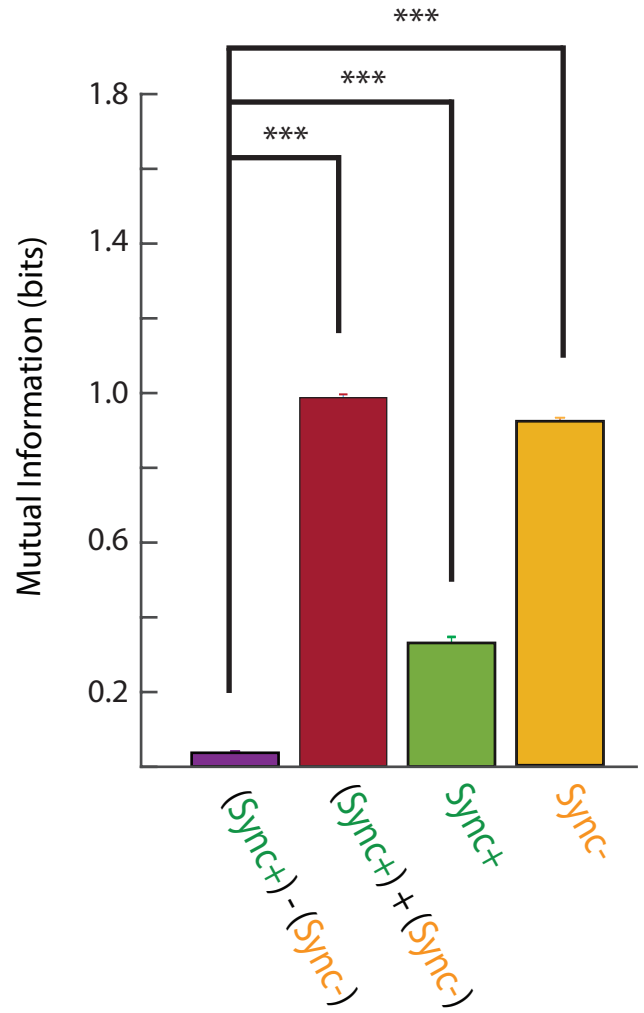

**Figure12.** Mutual information and opponent coding
